# Supplementary material for: Multi-Source Synthesis, Harmonization, and Inventory of Critical Infrastructure and Human-Impacted Areas in Permafrost Regions of Alaska (SIRIUS)
Source: Copernicus journal article supplement (doi:10.5194/essd-2023-393), 2024-01-08
Supplement: Supplementary file [file essd-2023-393-RC1-supplement.pdf]

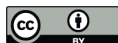

# Multi-Source Synthesis, Harmonization, and Inventory of Critical Infrastructure and Human-Impacted Areas in Permafrost Regions of Alaska (SIRIUS)

Soraya Kaiser<sup>1,2</sup>, Julia Boike<sup>1,2</sup>, Guido Grosse<sup>1,3</sup>, and Moritz Langer<sup>1,4</sup>

<sup>1</sup>Permafrost Research Section, Alfred Wegener Institute Helmholtz Centre for Polar and Marine Research, Telegrafenberg A45, 14473 Potsdam, Germany

<sup>2</sup>Geography Department, Humboldt-Universität zu Berlin, Unter den Linden 6, 10099 Berlin, Germany

<sup>3</sup>Institute of Geosciences, University of Potsdam, Karl-Liebknecht-Str. 24-25, 14476 Potsdam, Germany

<sup>4</sup>Department of Earth Sciences, Vrije Universiteit Amsterdam, De Boelelaan 1085, 1081 HV Amsterdam, Netherlands

**Correspondence:** Soraya Kaiser (soraya.kaiser@awi.de)

**Abstract.** The Arctic region has undergone warming at a rate more than three times higher than the global average. This warming has led to the degradation of near-surface permafrost, resulting in a  of ground stability. This instability not only poses a primary threat to Arctic infrastructure and human-impacted areas, but can also lead to secondary ecological hazards from infrastructure failure associated with hazardous materials. This development underscores the need for a comprehensive inventory of critical infrastructure and human-impacted areas, that is linked to environmental data to assess their susceptibility to permafrost degradation as well as the ecological consequences that may arise from infrastructure failure. In this study, we provide such an inventory for Alaska, a vast state covering approximately 1.5 million km<sup>2</sup>, with a population of over 733,000 people and a history of industrial development on permafrost. Our SIRIUS inventory integrates data from (i) the Sentinel-1/2 derived Arctic coastal human impact dataset (SACHI), (ii) OpenStreetMap, (iii) the pan-Arctic catchments summary database (ARCADE), (iv) the permafrost extent, probability and mean annual ground temperatures, and (v) the contaminated sites database and reports to create a unified new dataset of critical infrastructure and human-impacted areas as well as permafrost and watershed information for Alaska. The integration steps involved harmonizing spatial references, extents, and geometries, the usage of text mining techniques to generate additional geospatial data on contaminated sites – including contaminants, cleanup duration, and affected medium – from textual reports, and the incorporation of a uniform usage type classification scheme for infrastructure. The combination of SACHI and OSM enhanced the detail of the usage type classification for infrastructure from 5 to 13 categories, which allows for the identification of elements critical to Arctic communities beyond industrial sites. Further, the new inventory unites the high level of spatial accuracy from OSM with high level of completeness from SACHI. The SIRIUS dataset is presented as a GeoPackage, enabling spatial analysis and queries of its components, either in dependence or combination with one another.



## 20 1 Introduction

In the past decades, the Arctic has experienced a pronounced warming, entailing an increase in air temperature that is more than three times as high as the global average (Rantanen et al., 2022), referred to as Arctic Amplification (Cohen et al., 2014). These increasing air temperatures led to a warming and thawing of permafrost since  1980s (Biskaborn et al., 2019; Smith et al., 2022). As 15 % of the exposed land surface of the Northern Hemisphere are underlain by permafrost (Obu et al., 2019), this warming trend affects a vast area and has major implications for ecosystems and livelihoods in the Arctic and subarctic. With permafrost degrading, we not only expect the mobilization of one of the largest soil carbon pools (Schuur et al., 2015, 2022), but also substantial land surface changes that result from ground subsidence and thermal erosion (Van Everdingen, 2005). Numerous studies demonstrate intensifying land surface changes in the permafrost region which encompass among others processes such as thaw slumping (e.g. Runge et al., 2022; Ramage et al., 2017; Leibman et al., 2021), the development of thermokarst ponds and lakes (e.g. Muster et al., 2017; Jones et al., 2011), thermo-erosional gullying (e.g. Fortier et al., 2007; Godin et al., 2012), and ice wedge degradation (e.g. Liljedahl et al., 2016; Jorgenson et al., 2006) all pointing to an increasing loss in ground stability .

In the vicinity of Arctic settlements, the destabilization of the ground can cause severe infrastructure failure. Damage to housing units, transport networks (roads and airstrips), and water supply and sewage systems are frequently reported (Liew et al., 2022). Degradation of permafrost also threatens industrial infrastructure, including sites relevant for e.g. natural resource extraction, energy production, and further processing whose failure can be accompanied by a contamination of the environment (Rajendran et al., 2021; Langer et al., 2023). With the expansion of human activities and infrastructure development in the Arctic (Bartsch et al., 2021), increasing human-induced effects on snow and vegetation, as well as permafrost degradation, are observed in their vicinity, which further accelerates the destabilization of the ground (Walker et al., 2022; Bergstedt et al., 2022; Reynolds et al., 2014; Hammar et al., 2023). Model projections focusing on RCP 4.5 (Representative Concentration Pathways) (van Vuuren et al., 2011), indicate that approximately 69 % of Arctic infrastructure will face impacts of near-surface permafrost degradation by 2050 (Hjort et al., 2018). This will influence the lives of about 5 million people living in over 1000 settlements across the Arctic permafrost region (Ramage et al., 2021) (see Figure 1). Given the potential impact of near future permafrost degradation, it becomes imperative to generate comprehensive inventories of critical Arctic infrastructure and areas of human activity, allowing the assessment of their specific usage types, potential to failure, and relevance to local and regional livelihoods. Such an inventory is a prerequisite for determining exposure to natural hazards such as thaw induced ground destabilization, coastal erosion, and flooding which is pivotal to risk assessments.

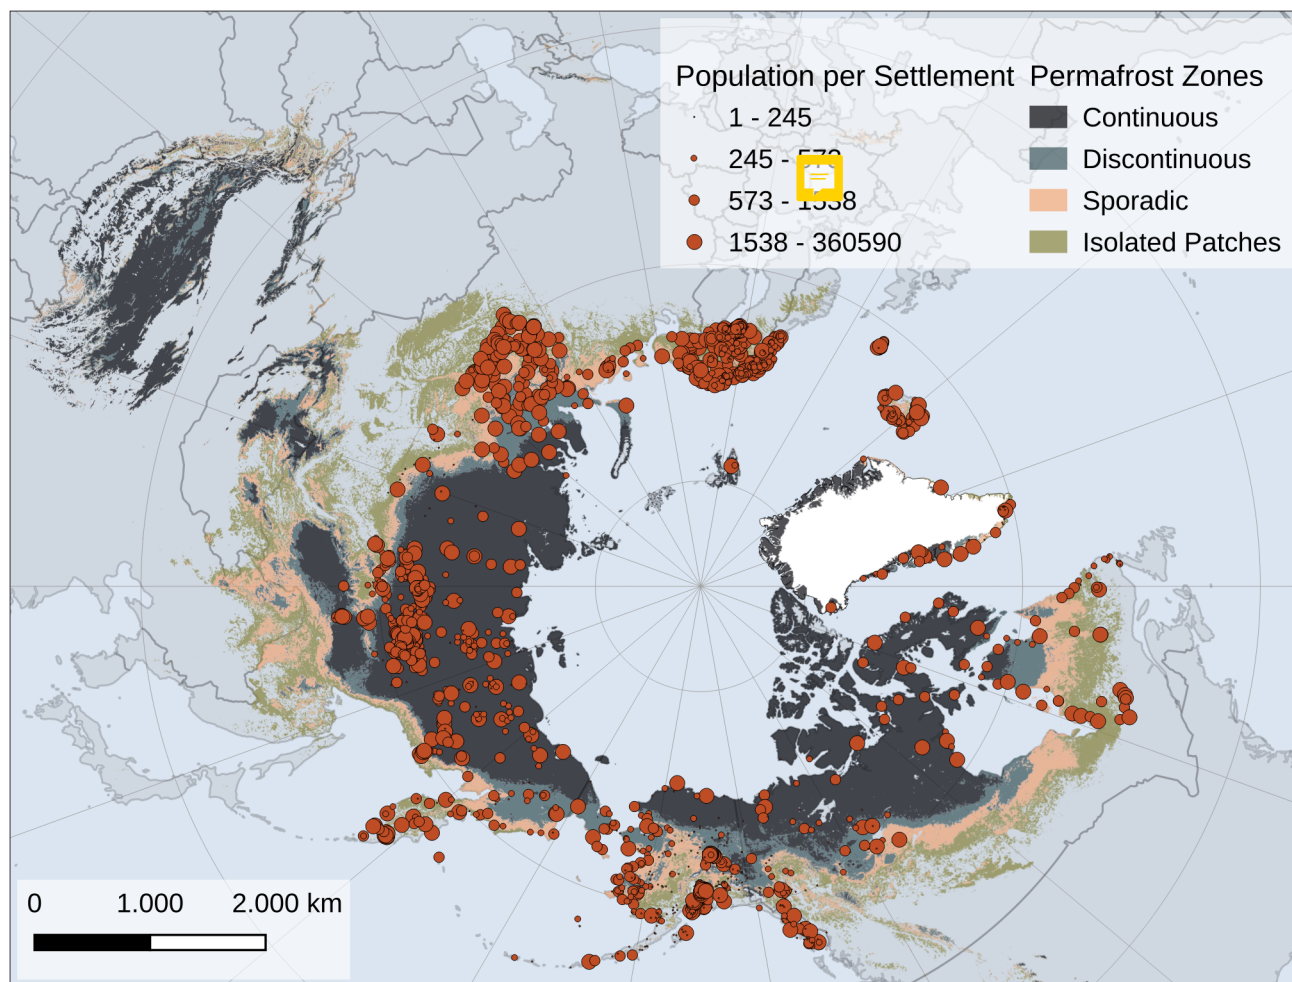

**Figure 1.** Pan-Arctic permafrost extent as modeled by Obu et al. (2019) together with population numbers of settlements in the Arctic Circumpolar Permafrost Region (ACPR) (Wang et al., 2021). The different sizes of the circles represent quantile and median values of population numbers. Basemap was made with Natural Earth: Free vector and raster map data @www.naturalearthdata.com.

Therefore, substantial efforts are being made to map settlements, areas of human activity, and industrial sites throughout the Arctic. Extensive databases have already been compiled regarding population numbers (Wang et al., 2021; Ramage et al., 2021), the occurrence and development of infrastructure along coastlines (Bartsch et al., 2020, 2021), and the distribution of industrial sites in the Arctic (Langer et al., 2023). The datasets focusing on Arctic infrastructure in particular and areas of human activities in general, however, are limited in spatial coverage (coastal areas, north of treeline (e.g. Bartsch et al., 2021; Xu et al., 2022)), spatial resolution and lack specific detail regarding usage type. Furthermore, because of their diverse research approaches, these datasets do not exhibit consistency in spatial references and geometry types (vector/ raster). To date, there is no comprehensive inventory that synthesizes various information about infrastructure and areas of human activity in the



Arctic and combines these information with essential environmental data such as permafrost occurrence and watersheds. In addition, for Canada and the U.S. there is a substantial volume of state-to-federal data on contaminated sites available (Langer et al., 2023). However, the geospatial data provided by government agencies is highly heterogeneous, offering the full range of detailed site chronologies (e.g. affected containment structures, ordered cleanup measures) as well as data about the polluting substances to sometimes only basic information about location, cleanup status, and responsible personnel. Additional details can then be found in written reports (Langer et al., 2023; State of Alaska Department of Environmental Conservation, 2023a) and each have to be extracted first, before they can be put into a spatial context. However, this detailed information is urgently required in a geospatial data format, not only to estimate the vulnerability of critical infrastructure and human-affected areas to permafrost degradation but also to assess the ecological consequences of contamination resulting from industrial infrastructure site failures.

Focusing on Alaska, we thus (i) harmonised existing multi-source data on infrastructure and human-impacted areas into a coherent usage type classification scheme, (ii) created a statewide inventory of these elements and enriched it with data on permafrost characteristics (extent, probability, and ground temperatures), watersheds, and sites of contamination, for which we extracted information on contaminants, cleanup duration, and the affected medium from available text reports, and (iii) enabled the spatial analysis and queries of the inventory together with ecological information in a database-like structure.

Following the CIIP manual (Critical Information Infrastructure Protection, CIIP2008) (Brunner and Suter, 2008), we define critical infrastructure as those sectors essential for the reliable functioning of communities. To better align with the modern and traditional ways of life in the Arctic and subarctic region, we have adjusted the internationally recognized core categories and extended them, as elaborated in Section 2.2.1.

## 2 Material & Methods

### 2.1 Study Site

Alaska is the largest and northernmost state in the U.S.. With a population of over 733,000 people (The Information Architects of Encyclopaedia Britannica) and a land area of approx. 1,5 million km<sup>2</sup>, it is also the least densely populated state in the U.S., with a population density of 1.3 people per square mile, in contrast to the rest of the U.S. with a density of 93 people per square mile (Department of Labor and Workforce Development, 2020). Alaska is home to over 300 communities, with Anchorage, Juneau and Fairbanks City being the biggest municipalities, housing 49 % of the overall population. The other near half of the population (44 %) resides in smaller settlements with fewer than 10,000 people (Department of Labor and Workforce Development, 2020), dispersed across the entire state. Many of these smaller settlements are only reachable by air or barge (Hamilton et al., 2016).

Naturally, with its vast expanse, it includes a range of different landscapes, from glaciers in the Brooks Range to tundra in the North Slope and boreal forests in the Alaska-Yukon region (The Information Architects of Encyclopaedia Britannica; Reynolds et al., 2019; Jorgensen and Meidlinger, 2015). There are also substantial variations in meteorological and permafrost characteristics, following a North-South gradient. In the North, a cold polar tundra climate (Beck et al., 2018) prevails, with



mean annual air temperatures (MAAT) of  $-10.4^{\circ}\text{C}$  (Climate Normals 1991-2010 of Deadhorse, see NCEI, 2023a) and a  
90 continuous permafrost extent (see Figure 1). The South on the other hand, is still characterized by a cold climate (Beck et al.,  
2018), but with much higher temperatures ( $4.5^{\circ}\text{C}$  MAAT for Homer, see NCEI, 2023b) and a permafrost extent transitioning  
to a discontinuously and sporadically underlain land surface.

It is important to note, that approx. 80 % of the state's area – accounting for nearly 200 settlements (refer to Figure 1) – fall  
within the permafrost region (Jorgenson et al., 2008; Ramage et al., 2021), which is projected to undergo massive changes in  
95 the upcoming decades (as outlined in Section 1). Challenges such as ground subsidence across the region and coastal erosion  
along the extensive and highly populated coastline (occupied by 83% of the population (NOAA Office for Coastal Management,  
2023)), will pose a high risk to the Alaskan population and economy (Ramage et al., 2021; Nelson et al., 2001; Irrgang et al.,  
2022; Hjort et al., 2018).

Apart from its value to the global fishing industry (Markon et al., 2018), Alaska has many other industries highly contributing  
100 to the economy: transportation and warehousing (including cargo, passengers but also sightseeing transportation), finance,  
insurance, real estate, and government and government enterprises (including community services such as military, postal  
service, etc.) (Bureau of Economic Analysis, 2023a, b). However, the most important contribution stems from the mining,  
quarrying, and oil and gas extraction industry (Bureau of Economic Analysis, 2023a). Notably, the oil exploration units in  
the North Slope and Cook Inlet play a vital role in Alaska's revenue, having contributed 38 % of the general funds in the  
105 2019 fiscal year (Alaska Oil and Gas Association, 2020, 2021). Nevertheless, the continued development of infrastructure  
and human-impacted areas, and oil exploration sites in the North, along with the associated transportation and infrastructure  
networks, have already led to an increase in thermokarst occurrence (Raynolds et al., 2014; Walker et al., 2022). Furthermore,  
given the extensive energy production operations, there is an inherent risk of environmental contamination resulting from  
infrastructure failures. This, in conjunction with both natural and human-induced degradation processes, underscores the need  
110 for a comprehensive and freely accessible database encompassing critical infrastructure and human-impacted areas on one  
hand and environmental information concerning watersheds and permafrost on the other.

## 2.2 Data Harmonization & Mining

The SIRIUS (Synthesized Inventory of CRITICAL Infrastructure and HUman-Impacted Areas in AlasSka) dataset synthesizes  
data from five different sources: (i) the Sentinel-1/2 derived Arctic coastal human impact dataset (SACHI) (Bartsch et al.,  
115 2021), (ii) OpenStreetMap dataset for the infrastructure and land use information (OpenStreetMap Contributors and Geofabrik  
GmbH, 2018), (iii) the pan-Arctic catchments summary database (ARCADE) for the watersheds (Speetjens et al., 2022), (iv)  
the modeled Northern Hemisphere permafrost map by Obu et al. (2018), and (v) the contaminated sites database and reports by  
the State of Alaska Department of Environmental Conservation (2023a) (DEC). After acquiring the latest updates (see Table  
A1 in the Appendix) of these individual spatial datasets, the primary task was to harmonize them to create a semantically and  
120 geometrically coherent and uniform data product. Initially a thorough homogenization of the spatial reference was required.  
All datasets were reprojected to the the World Geodetic System 1984 with an Alaska polar stereographic map projection  
(EPSG Code 5936). Subsequently, we clipped every dataset's spatial extent to the state boundary of Alaska as provided by



the National Weather Service (2023). Each dataset had to undergo further geometric harmonization processes such as merging individual vector files, creating buffer zones along linear features, and clipping to layer spatial extents. Thereafter, we performed spatial analyses such as spatial overlays and joins to determine overlapping features and retrieve their information. Detailed information on the dataset's content and applied processing steps are explained in detail in the following sections. All data processing was done using Python with its geospatial data processing libraries geopandas, pandas, numpy, osgeo, rasterio, and rioxarray. The data processing scripts are downloadable from our Zenodo repository.

### 2.2.1 Infrastructure and Human-Impacted Areas

The Sentinel-1/2 derived Arctic coastal human impact (hereafter SACHI) dataset contains buildings, road and railway networks and other human-impacted areas in the Arctic coastal regions up to 100 km inland (Bartsch et al., 2020). The infrastructure features in SACHI were derived from Sentinel satellite imagery using machine learning and were blended with auxiliary information from other datasets (Bartsch et al., 2021). Each infrastructure feature holds among others information on the settlement name, the feature's class, the primary economic activity (attribute "Use") and the general economic activity (attribute "Use main") (Bartsch et al., 2021). The value of the attribute "settlement name" was assigned on the basis of the settlement dataset by (Wang et al., 2021), with a 40 km buffer applied to also incorporate surrounding infrastructure. Features outside this buffer were labeled following the Google hybrid data layer (Bartsch et al., 2021). Each settlements (and surrounding) was then assigned one economic activity category. This procedure resulted in a rather coarse definition of use categories. For example, the settlement of Nome is assigned the general use category "Mining", with no further distinction, and for the Nome-Teller highway connecting both settlements, the southern part (Nome) is assigned "Mining", while the northern part counts towards the "Fishing" industry in Teller City. This generalization does not allow the differentiation of use categories within settlements and beyond. As the SACHI dataset was derived using a pixel-based approach, linear infrastructure is also represented as polygons. The "class" attribute specifies whether a feature corresponds to linear transport infrastructure (class = 1), a building (class = 2), or another human-impacted area (class = 3). When examining the linear transport infrastructure, we observed some gaps in the data, particularly in settlements. Extracting narrow paths or distinguishing between a linear gravel road and other human-impacted areas, such as driveways or exploration pads, were difficult with the limited spatial resolution of Sentinel sensors (10 m) (Bartsch et al., 2021). Due to these limitations, we decided to use OpenStreetMap data to represent the linear transport infrastructure.

The OpenStreetMap (hereafter OSM) project is a collaborative initiative involving mappers from around the globe, aiming to provide highly detailed and comprehensive map data (OpenStreetMap Foundation, 2023). It offers a wide range of geographic features, encompassing various categories such as settlement types (e.g., cities, hamlets, villages), road classifications (e.g., motorways, footways, primary and secondary roads), railway networks, amenities, man-made structures, and more (OpenStreetMap Wiki, 2023). Notably, the road and railway networks in OSM are represented as line features, which enables the execution of spatial queries. For instance, it facilitates queries about the total length of road network sections situated on different types of permafrost or within specific catchment areas, as well as the identification of potential contamination along transportation routes. Another advantage of OSM is its data availability for the entire region of Alaska. We acquired the latest



OpenStreetMap dataset for Alaska from 20 January 2023 (OpenStreetMap Contributors and Geofabrik GmbH, 2018) (Figure 2). Our focus lay on areas (farmland, commercial areas, etc.) and elements (small-scale features such as hunting stands, memorials, etc.) that are directly influenced by human activities and are shaped by practical land use. Therefore, we excluded OSM files which contained information about water bodies and natural features: "waterways" for the linear infrastructure files and "natural" and "water" for the polygonal and point infrastructure files. We also excluded information on the orientation (Buddhist, Jewish, etc.) of religious sites: "pofw" (places of worship). Buildings such as churches, chapels, and burial grounds (cemeteries) were retained. Subsequently, we merged the linear OSM infrastructure files into one dataset. To assess how the linear OSM infrastructure dataset compares to the pixel-based SACHI dataset, we compared their polygonal representations. For this, we converted the linear OSM infrastructure to polygons by applying a buffer around each linear feature: major highways and roads (OpenStreetMap Wiki, 2023) were assigned a width of 20 m to account for possible embankments, sliproads, ramps, etc.. For the rest of the road network and the railway lines, we assumed a width of 10 m. Subsequently, we clipped the polygonal OSM dataset - representing the linear infrastructure features - to the spatial extent of the SACHI dataset and compared their respective areas to each other.

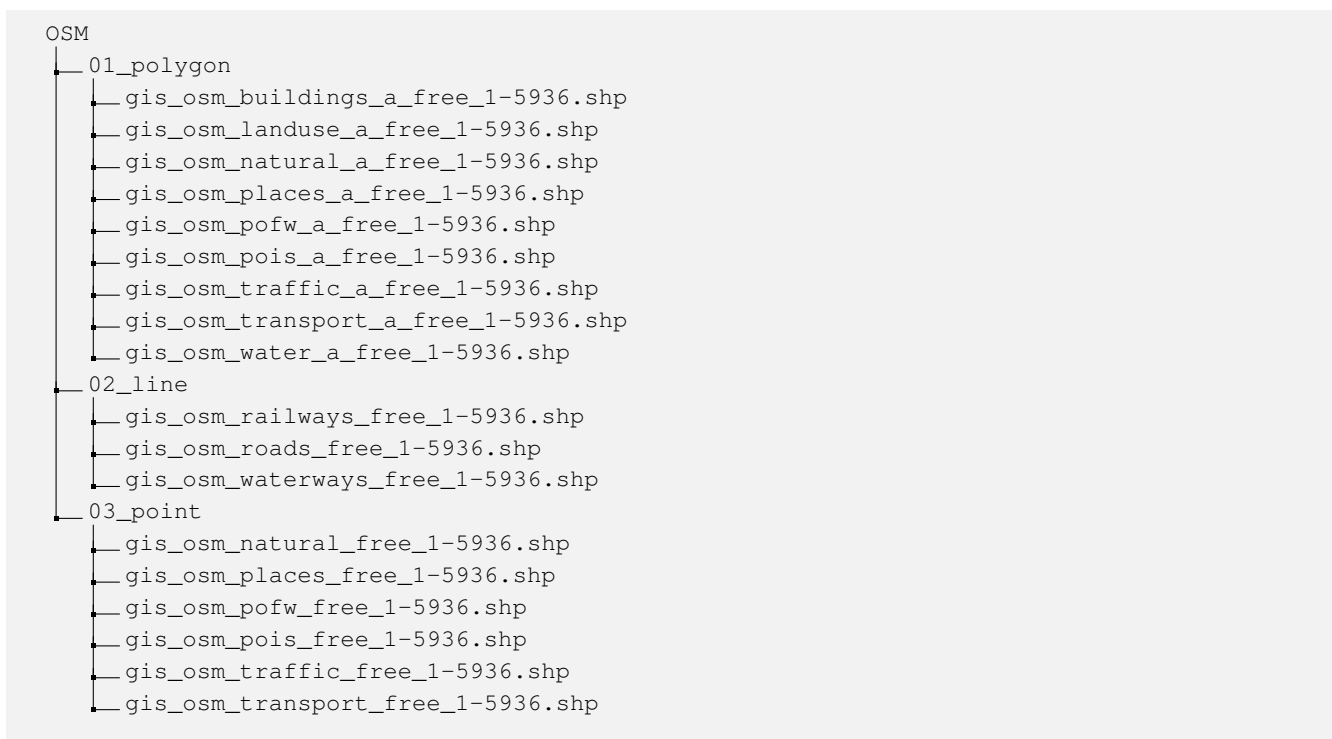

**Figure 2.** Tree structure of OSM input data folder. OSM data was retrieved from OpenStreetMap Contributors and Geofabrik GmbH (2018) on January 20, 2023.



170 After merging the linear rail and road network OSM data, we combined the polygonal OSM infrastructure data into a single  
GeoDataFrame. The attribute "fclass" of the polygonal OSM GeoDataFrame contains the tag, which people use to describe the  
mapped feature. In the OSM Wiki (OpenStreetMap Wiki, 2023), these tags are listed following a certain key and value combi-  
nation, a mapping standard most members of the community follow. As a first step, we derived the unique values of the attribute  
"fclass" and compared them to the OSM values defined in the Wiki (OpenStreetMap Wiki, 2023). Generally, the tags under  
175 "fclass" were in agreement with the OSM values of the Wiki. Some mismatches originated from different expressions, e.g.  
„town\_hall“ instead of „townhall“, „archaeological“ instead of „archaeological\_site“ or „mobile\_phone\_shop“ instead of „mo-  
bile\_phone“. Some tags were actual additions from the OSM mapping community, e.g. parking\_multistorey, recycling\_paper.  
Further, we removed any occurring tags describing natural features (waterfalls, etc.) and places (island, heath, village, etc.),  
which portray localities and their population in which multiple usage types are possible. Table A shows the retrieved values  
180 of "fclass" and their corresponding OSM keys and values, which we assigned manually following the above mentioned Wiki.  
The predominant tag under "fclass" was "building“. This tag represents 81% of the polygonal OSM dataset. To determine the  
usage type for these buildings, we analyzed their attribute "osm\_type" of the dataset and once again compared the tags under  
"osm\_type" to the OSM keys and values of the OSM Wiki. Having identified all of the tags under "fclass" and "osm\_type"  
and assigned them an OSM key and value, we had gathered information on the features's main usage and purpose and could  
185 categorize them into usage categories. For this, we followed the Land Use / Cover Area frame statistical Survey (LUCAS) of  
Eurostat (E4.LUCAS (ESTAT), 2018), which provides a framework for a consistent classification and harmonization of land  
use/ land cover data (see Table 1).

This categorization allows us to incorporate the aspect of sectors critical to the functioning of Arctic communities. While  
our core categories of critical infrastructure align with internationally defined sectors (Brunner and Suter, 2008), which include  
190 food and water supply, banking and finance, government services and institutions, transport and mobility, information and  
communication, energy production, health and sanitation, we also introduce two additional categories: ecological & traditional  
sustainability, and environmental protection. The latter category refers to any infrastructure that may pose environmental threats  
in the event of failure. This category is particularly significant for traditional lifestyles, such as hunting and fishing, which we  
consider within the ecological & traditional sustainability category, as they rely on intact terrestrial and aquatic ecosystems. In  
195 this category, we also include sites of cultural heritage (cemeteries, tents, yert, etc., see e.g. Irrgang et al. (2019)).

Table A shows the assigned LUCAS category for each OSM tag. As the linear OSM data only consists of railway and road  
network data, no further classification was needed.

After implementing the initial assignment based on the given scheme, we noticed that all of the tags under "fclass" were  
effectively categorized except for one: the "building" tag posed a challenge as the corresponding "osm\_type" attribute lacked  
200 detailed information on the usage type for 86 % out of 144,000 building features. To address this, we internally overlaid these  
unknown usage type building with the known usage type non-building features and assigned their tag for the overlapping areas.  
This analysis revealed that the buildings tag frequently features various usage types, such as shops, offices, parking areas, and  
more. To harmonize this, we aggregated these diverse usage types and assigned the predominant usage type.



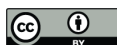

**Table 1.** LUCAS categories with their respective sectors critical to Arctic and subarctic communities.

| Category Nr. | LUCAS                                                           | Critical Sector                                                                      |
|--------------|-----------------------------------------------------------------|--------------------------------------------------------------------------------------|
| 01           | Agriculture                                                     | Food Supply                                                                          |
| 02           | Commerce, finance and business                                  | Banking & Finance                                                                    |
| 03           | Community services                                              | Health & Sanitation, Government services,<br>Ecological & Traditional Sustainability |
| 04           | Construction                                                    | –                                                                                    |
| 05           | Energy production                                               | Energy Production                                                                    |
| 06           | Fishing                                                         | Ecological & Traditional Sustainability                                              |
| 07           | Forestry                                                        | Ecological & Traditional Sustainability                                              |
| 08           | Hunting                                                         | Ecological & Traditional Sustainability                                              |
| 09           | Industry and manufacturing                                      | Environmental Protection                                                             |
| 10           | Mining and quarrying                                            | Environmental Protection                                                             |
| 11           | Recreational, leisure and sport                                 | –                                                                                    |
| 12           | Residential                                                     | –                                                                                    |
| 13           | Transport, communication networks, storage and protective works | Transport & Mobility, Information & Communication                                    |
| 14           | Unused                                                          | –                                                                                    |
| 15           | Water and waste treatment                                       | Water Supply, Health & Sanitation                                                    |

We processed the point OSM infrastructure data files in the same way: generating one GeoDataFrame containing all point features and assigning them a LUCAS category based on their tag under "fclass". Eventually, we repeated the LUCAS category assignment for the SACHI dataset: each usage value was assigned a LUCAS category, see table A3.

When comparing the SACHI and OSM datasets, we again observed, that the OSM data had a higher level of detail. The buildings' boundaries of the OSM dataset were delineated accurately (see Fig. 3a), while the buildings' outlines of the SACHI dataset were coarse and contained adjacent non-building areas due to the pixel-based approach (Fig. 3b). However, the SACHI approach detected more building area. Therefore, we implemented a decision tree structure for the last harmonization step of the infrastructure and usage type datasets. As a first step, we retrieved all overlapping features of the OSM and SACHI dataset with a spatial join. When the OSM feature already had a LUCAS category assigned, we stored it in the final infrastructure and usage type dataset. If not, we assigned it the LUCAS category of the overlapping SACHI feature. All other non-overlapping SACHI and OSM features were also stored in the final infrastructure and usage type dataset.

## 2.2.2 Accuracy Assessment

To assess the accuracy of our data integration of infrastructure and human-impacted areas, we sub-sampled an area of 0.3 km<sup>2</sup> of the coastal settlement Shishmaref for which very high-resolution imagery was available. We built a reference dataset by man-

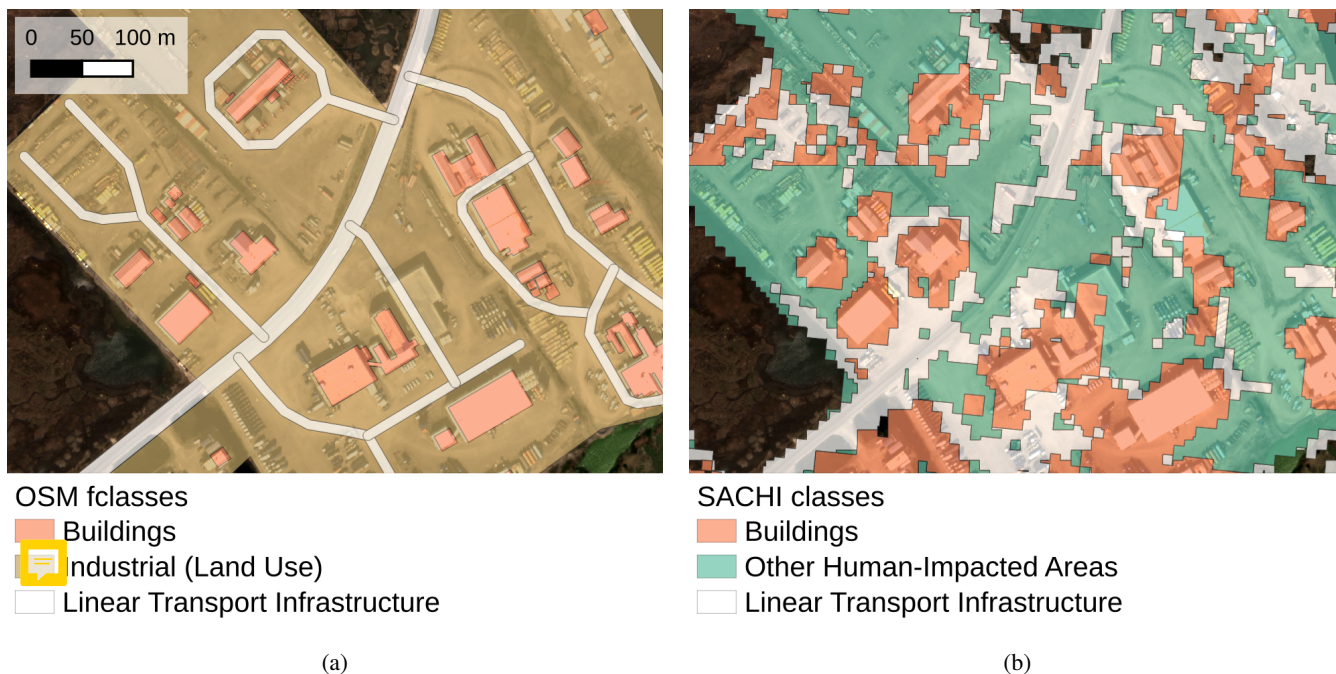

**Figure 3.** Comparison of level of detail of original (a) OSM and (b) SACHI dataset. OSM shows a higher detail in mapping buildings, land use boundaries and linear transport infrastructure in contrast to SACHI, where the delineation is done with a pixel-based classifier (Bartsch et al., 2021). Background RGB high-resolution imagery of Deadhorse is from WorldView-3 (Copyright: DigitalGlobe, 2016). OSM data copyrighted by © OpenStreetMap contributors, licensed under the Open Data Commons Open Database License (ODbL).

usually digitizing all presumably permanent infrastructure elements using multi-spectral (RGB+NIR) orthophotos with a spatial resolution of 10 cm acquired in 2021 with the Modular Aerial Camera System (MACS) by Rettelbach et al. (2023). Buildings and other polygonal infrastructure features, such as shipping containers, small sheds, and coastal protection structures were mapped at a scale of 1:500. An infrastructure feature was considered permanent when it exhibited characteristics indicating a fixed location, such as supply pipes for shipping containers, fixed roofing, etc.. Roads were mapped at a scale of 1:2500 and solely if they exhibited an approximate width of 10 m or more to comply with the spatial resolution of the Sentinel sensors of SACHI. Subsequently, we created a grid layer spanning the mapped area with a size of 10 by 10 m for each grid cell. Each grid cell was assigned the corresponding values of the i) reference dataset and ii) the SIRIUS infrastructure and human-impacted area dataset: the OSM keys and values, "fclass", and the binary information if an infrastructure feature intersected with the grid cell (yes/ no). This allowed the calculation of a confusion matrix for the linear and polygonal infrastructure to determine the performance of the SIRIUS dataset.

In a confusion matrix, the classified dataset – in our case the SIRIUS infrastructure and human-impacted areas data – is compared with the reference dataset to determine the performance of the classification (Maxwell et al., 2021). The matrix provides information on correctly classified pixels (true positives: a "true" infrastructure feature of the reference dataset is also represented in the SIRIUS inventory; true negatives: a grid cell of the reference dataset does not show an infrastructure feature,



neither does the SIRIUS inventory) and missclassifications (false positives and false negatives). A common metric derived from a confusion matrix is the overall accuracy (OA), the ratio of correctly classified pixels (true positive and true negative) to the total number of pixels (true or false) (Albertini et al., 2022).

### 2.2.3 Contaminated Sites of Alaska

The Contaminated Sites Program (CSP) of the Alaskan Department of Environmental Conservation (DEC) provides statewide information about the contamination by hazardous substances and manages their cleanup (State of Alaska Department of Environmental Conservation, 2023a). The DEC dataset entails information on the site name, address, geographic coordinates, cleanup status, responsible staff, contact person and the URL to a detailed site report. This report contains complementary information on the contaminated medium (soil, groundwater, etc.), the substances (diesel, petroleum, etc.), and the date and type of cleanup measurements. For our purpose of providing a harmonized dataset on contamination and infrastructure and human-impacted elements which allows users to assess their interrelation with permafrost degradation and hydrological watersheds in Alaska, we downloaded the detailed site report for each location. With basic text mining tasks (regular expressions, filtering for words in uppercase, etc.), we firstly derived all abbreviations of the site report. We compared the abbreviations to the DEC glossary (State of Alaska Department of Environmental Conservation, 2023b) and saved the ones indicating a substance or containment structure associated with contamination (e.g. LUST - Leaking Underground Storage Tank, PCBs - Polychlorinated Biphenyls, etc.) to a new attribute "contaminants" of the dataset. Subsequently, we deemed the dates followed by the expressions "Site Added to Database" and "Site Closure Approved" or "Cleanup Complete" (after 2008, (State of Alaska Department of Environmental Conservation, 2023c)) as the start and end date of the cleanup and saved them to the attributes "first\_date" and "last\_date", which allowed us to calculate the total cleanup time (attribute "cleanup\_days"). If these expressions didn't appear in the site chronology report, we assumed the first and last mentioned date to be the start and finish of the cleanup. From this, we calculated the total cleanup time in days and saved it as an additional attribute. These simple text mining analyses were sufficient for deriving dates and abbreviations in uppercase letters as well as for comparing our list of toxic substances and containment related keywords against the full-text reports. However, we also wanted to provide information on the predominantly contaminated medium, so whether the groundwater, soil, or adjacent waterbodies were impacted. Here, we had to deal with a high heterogeneity in the structure of each report. Some reports listed the contaminated medium under the section „Contaminant Information“. By comparing a set of medium keywords (soil, groundwater, river, etc.) against this section, we retrieved the contaminated medium.

### 2.2.4 Permafrost Data

As described for the infrastructure and contamination datasets, we assigned the joint spatial reference to the permafrost datasets and clipped their extent to the state boundary of Alaska. We derived the permafrost information from the modeled Northern Hemisphere permafrost map for 2000-2016 by Obu et al. (2018). The dataset comprises three GeoTIFF raster files containing the mean annual ground temperature (MAGT), the MAGT standard deviation, the permafrost probability fraction, and one vector file (ESRI Shapefile) giving information on the permafrost extent. The dataset is an estimation based on the TTOP



(temperatures at the top of permafrost) model, which uses the mean annual air temperatures (MAAT) to model the MAGT and subsequently the permafrost probability and zonation (Obu et al., 2019). It has a resolution of 1 km<sup>2</sup> and was validated by borehole data (Obu et al., 2019). Within our study, we integrated the data on permafrost probability fraction and filtered for raster values where the probability of permafrost occurrence was greater than 50% (Langer et al., 2023). The filtering step  
270 enabled us to concentrate on regions where permafrost is most likely to exist. Following that, we vectorized the raster data to ensure compatibility with the other vector datasets. Given that each pixel value in the MAGT raster file was provided with precision to five decimal places, our initial step involved rounding these values to a single decimal place before proceeding with the vectorization process. We also included the vector data on the permafrost extent (zones) to allow the user to query data in dependence of permafrost zone, e.g. continuous, sporadic, etc..

### 275 2.2.5 ARCADE Watershed Database

The pan-Arctic catchments summary database, referred to as ARCADE, comprises a comprehensive collection of over 40 000 catchments draining into the Arctic Ocean down to a Strahler order of five (Speetjens et al., 2022). The geometries of the watersheds were derived from the Copernicus Digital Elevation Model with a spatial resolution of 30 arc seconds (approximately 1 km). Additional information regarding the catchments' characteristics (elevation, slope, etc.), climatology (precipitation,  
280 snowfall, runoff, etc.) and physiography (soil characteristics, permafrost parameters and extent, land surface data, etc.) were already incorporated to enrich the dataset (Speetjens et al., 2022). However, the permafrost extent and information on the MAGT were averaged over the extent of each watershed, which reach sizes of up to 3.1x10<sup>6</sup> km<sup>2</sup> (Speetjens et al., 2022). Therefore, we chose to include the information on every 1 km<sup>2</sup> grid cell of the permafrost MAGT dataset by Obu et al. (2019), see section 2.2.4.

### 285 2.3 Data Usability

To enhance spatial queries involving different usage types, contaminated sites, watersheds, and permafrost information, it was necessary to consolidate the individual pre-processed files into a single container. For this, we chose the GeoPackage format, as specified by the Open Geospatial Consortium (OGC). The GeoPackage format facilitates the exchange of geospatial data across different platforms, is open-source (Open Geospatial Consortium, 2023), and eliminates the need to handle multiformat  
290 data formats like Shapefiles. Thus, it is highly suitable for accommodating the diverse data handling preferences of potential users. As GeoPackage uses a SQLite database container, the user is able to conduct their analyses within established geographic information systems such as ArcGIS, QGIS or spatial databases (Geopackage Contributors, 2020; Warmerdam et al., 2023).

We demonstrate the usability of our data product by presenting and discussing various contexts in which the data can be used, see Section 3.2.1. These contexts may encompass risk assessments related to public health and potential infrastructure  
295 failures, statistical analyses, as well as basic cost calculations for clean up measurements at contaminated sites.



### 3 Results

#### 3.1 Data Harmonization & Mining

In this section, we outline the enhancements made to the infrastructure and human-impacted elements dataset of Alaska, as well as the information on contaminated sites. To showcase the advancements achieved by combining the SACHI and OSM data, we focused on two coastal regions, Nome and Prudhoe Bay, by sub-sampling their respective datasets. Furthermore, we investigated the performance of simple text mining tasks for the contaminated sites. For this, we randomly selected ten sites from the dataset and verified the accuracy of the derived start and end dates, cleanup duration, and information regarding the substances and contaminated medium. Subsequently, we analyzed in which cases the simple text mining approach performed well and identified its limitations in other instances.

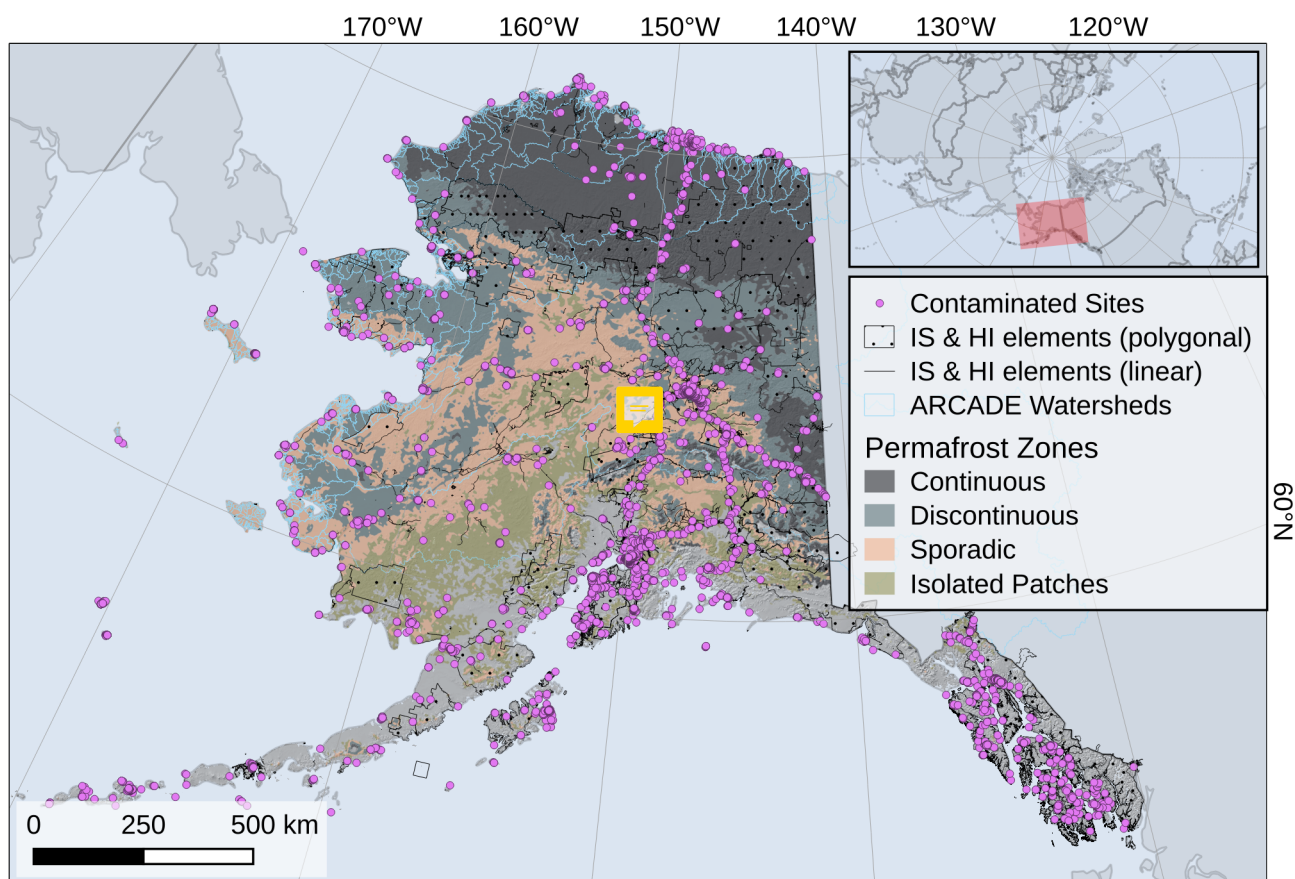

**Figure 4.** Overview of synthesized data. OSM data copyrighted by © OpenStreetMap contributors, licensed under ODbL. Basemap was made with Natural Earth: Free vector and raster map data @www.naturalearthdata.com..



### 305 3.1.1 Infrastructure and Human-Impacted Areas

The data fusion of the OSM and SACHI datasets resulted in an infrastructure and human-impacted areas map with a higher spatial detail and coverage than the original data sets. Through the incorporation of OSM data, we successfully extended the coverage of the SACHI coastal area data from 62 km<sup>2</sup> to span the entire state, now encompassing an expansive 640,593 km<sup>2</sup>.

Furthermore, this integration allowed us to enhance the level of detail regarding the usage categories for various infrastructure features. While we could initially assign five LUCAS categories to the SACHI data, including Fishing, Mining and Quarrying, Energy Production, Community Services, and Recreational, leisure, and sport, the inclusion of OSM data expanded this categorization to include an additional eight categories: Agriculture, Commerce, finance, and business, Construction, Forestry, Industry and Manufacturing, Residential, Transport and communication networks, and Waste and Water Treatment. (Refer to Table A4 and Figure 6 for a detailed breakdown.)

315 This comprehensive categorization enhancement enabled us to refine the generalized approach. For example, we discovered that energy production sites, initially thought as dominant with an area of 28 km<sup>2</sup> in coastal regions, were, in reality, less extensive, covering only 17 km<sup>2</sup> across the entire state (see Table A4).

However, by incorporating the SACHI dataset, the map now also encompasses small and isolated elements like gravel pads and small paths, which weren't mapped by the OSM community but successfully derived from the satellites (refer to section 320 2.2). On the other hand, the integration of OSM data provided a heightened level of detail, enabling clear identification and differentiation of roads and single buildings (see Figure 5c).

Looking at the settlement Nome under SACHI, we identified "Mining and Quarrying" as the primary land use category, aside from the transport network. These categories were determined by applying a buffer around each settlement (refer to section 2.2.1) and assigning it one predominant value (see Figure 5b). Combining the SACHI with the OSM data not only enhanced the quality of the transport network, where streets are clearly defined even within areas with a high density of buildings and other human impacted areas, but also improved the detail of these usage type categories (Figure 5c). We learned that the majority of the settlement's area is actually residential, characterized by houses and recreational areas such as pitches and parks (see Figures 5a and 5c). The OSM data also added detail, where the spatial resolution of the SACHI product derived from Sentinel satellites fell short. For example, the pier in the Western area was not captured by the Sentinel satellites, but digitized by the OSM community. However, comparing the resulting human-impacted areas and infrastructure map with aerial imagery from Bing (as accessed via the QGIS Plugin) revealed that there is a second pier, which did not appear in the OSM nor in the SACHI dataset. Nonetheless, the true added value of the SACHI dataset lay in its information on small features such as extraction pads and others, which only occasionally appear in the OSM data.

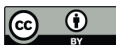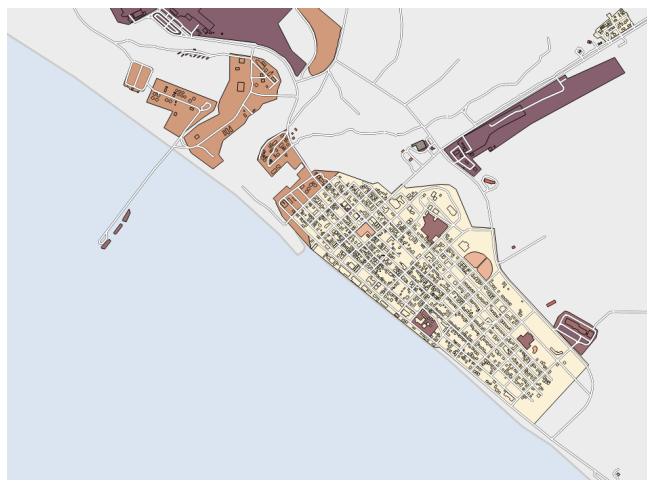

(a) OSM

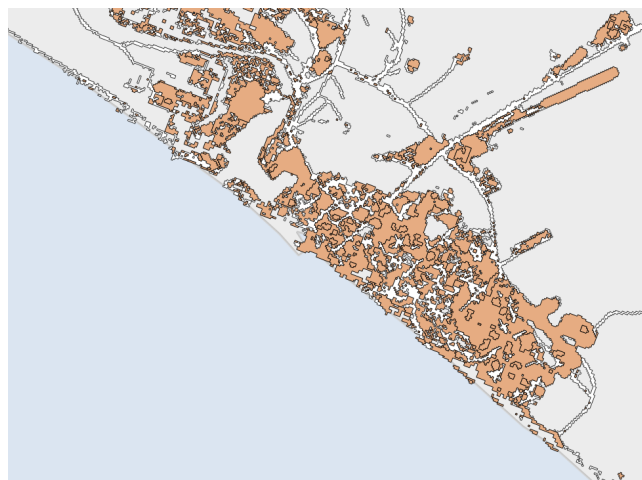

(b) SACHI

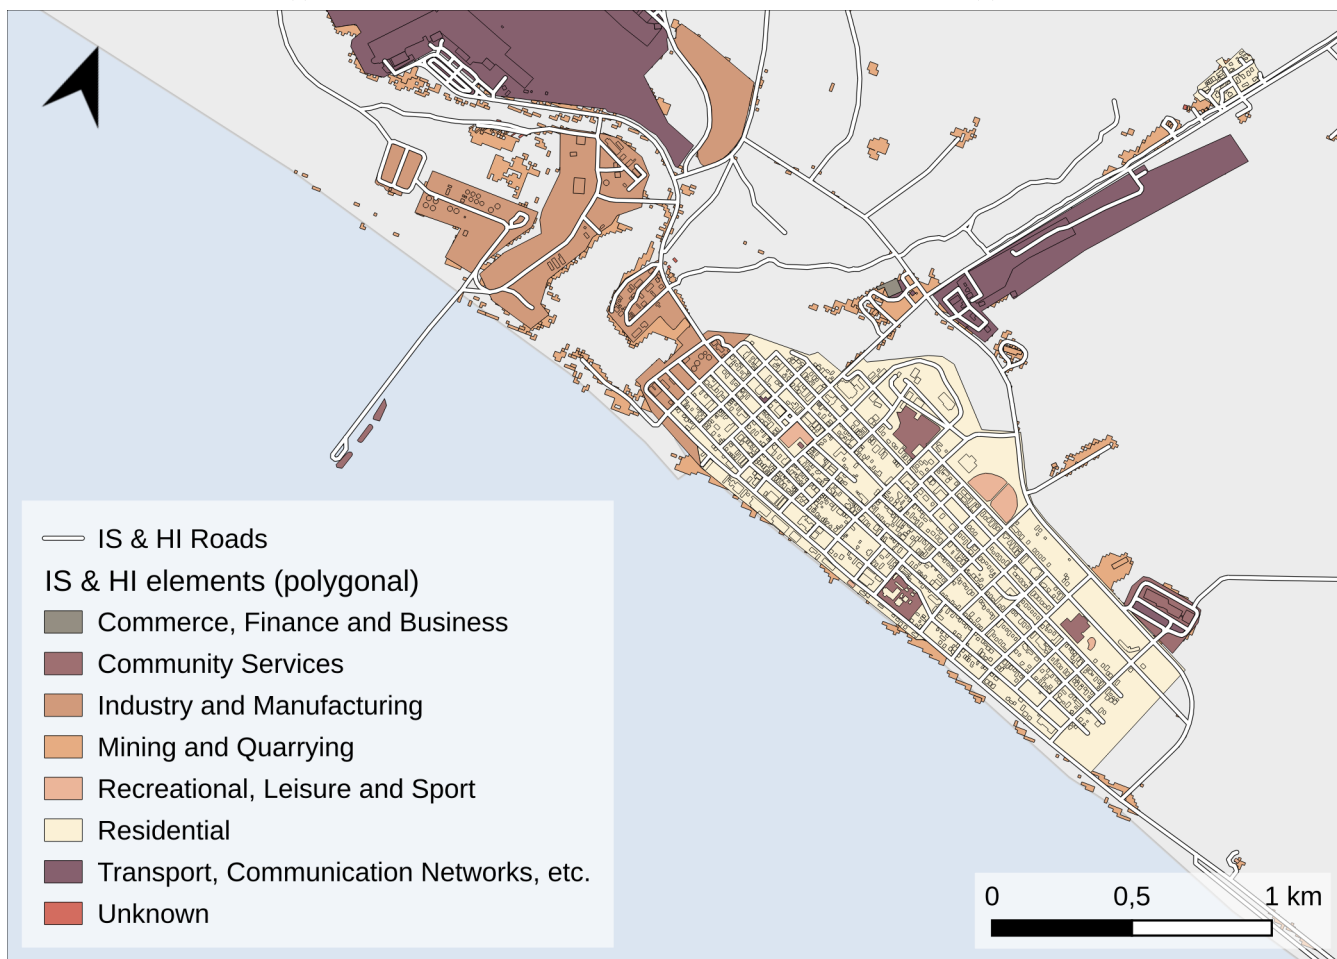

(c) Resulting infrastructure and human-impacted areas map after fusion of SACHI and OSM data.

**Figure 5.** Input data from a) OSM and b) SACHI assigned to LUCAS categories for the example of the settlement Nome located along the Bering Sea coast. Map c) shows the harmonized data on infrastructure and human-impacted areas. OSM data copyrighted by © OpenStreetMap contributors, licensed under ODbL. Basemap was made with Natural Earth: Free vector and raster map data @www.naturalearthdata.com.



A closer examination of the Prudhoe Bay area confirmed this observation. Once again, the SACHI dataset showed more human-impacted elements, probably from expanding exploration sites, while OSM offered more spatial detail. Furthermore, at both sites, we found that OSM exhibited higher quality in terms of linear infrastructure objects such as roads and rail lines. As mentioned in section 2.2, we compared the areas of the linear transport network between SACHI and OSM to evaluate the potential limitations of using OSM data. However, we discovered that the difference in area was only 5 km<sup>2</sup> (or 6 % of the total SACHI linear infrastructure area), as shown in table A4.

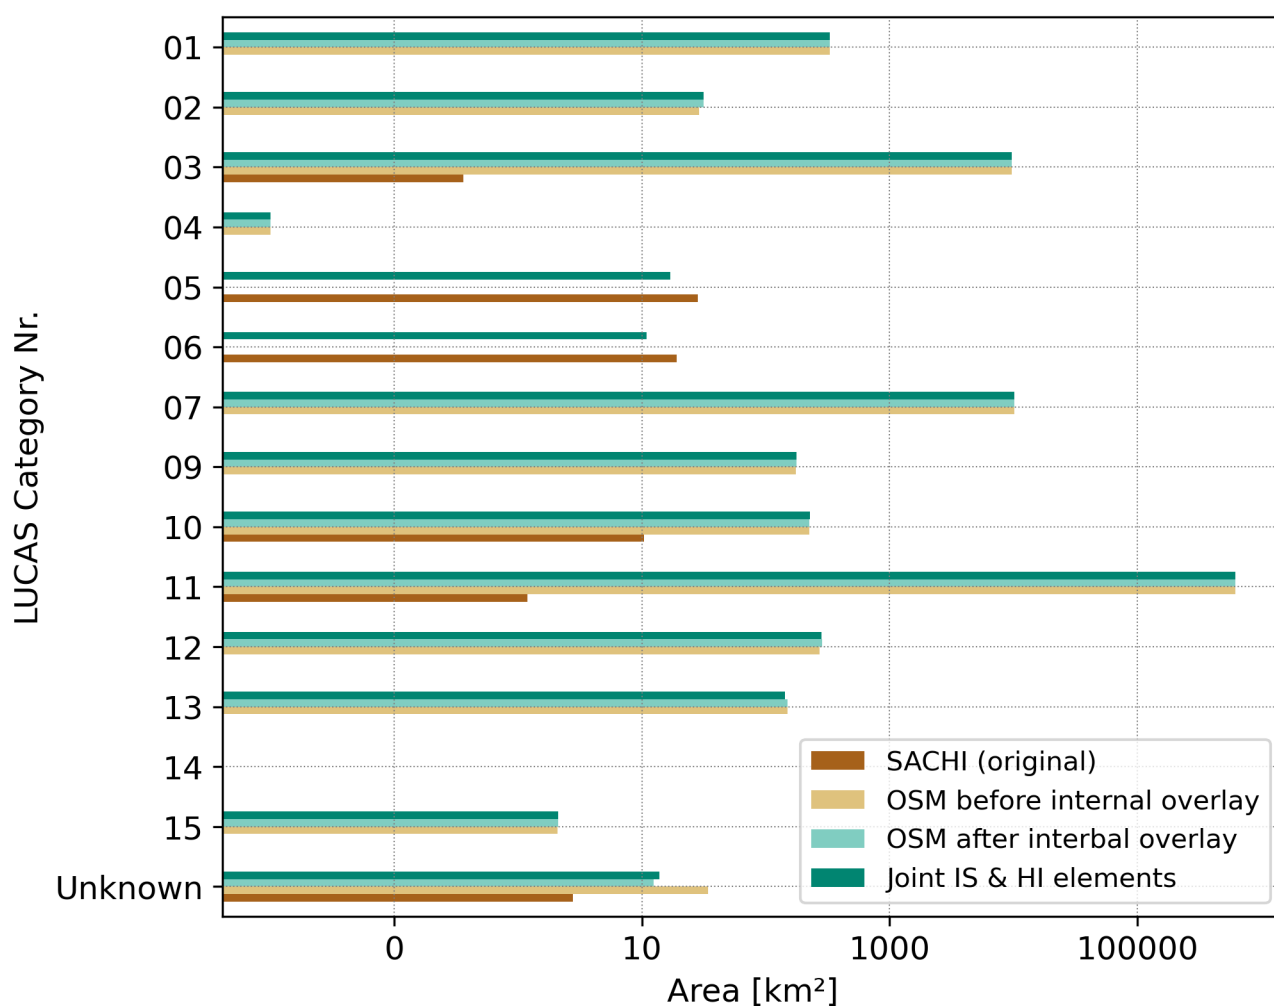

**Figure 6.** Improvement of spatial coverage and usage type categorization. Area [km<sup>2</sup>] per LUCAS category for (i) the original SACHI dataset (only coastal areas), (ii) OSM before and (iii) after the internal overlay (complete extent of Alaska), and (iv) after combining both datasets within our inventory of infrastructure and human-impacted areas. For detailed values refer to Table A4. LUCAS category numbers are defined in Table 1.





340 The resulting infrastructure and land use layer not only represents economic activities but also incorporates the population's requirements, including agricultural areas, commercial zones, recreational spaces, and more. We also observed a significant decrease in the number of features with unknown land use types by internally overlaying OSM buildings with non-building OSM information, see Figure 6 and Table A4. Prior to the internal overlay, the area with unknown land use was 34 km<sup>2</sup>, whereas after the overlay, it reduced to only 13 km<sup>2</sup> (refer to Table A4). This enhanced level of usage type detail allows for various  
345 applications, such as risk assessments for energy production facilities and transportation networks, as well as evaluations of contaminated sites close to recreational or agricultural areas (refer to section 3.2.1).

### 3.1.2 Accuracy Assessment

The overall accuracy of the confusion matrix represents the ratio of correctly classified pixels to the total number of positive and negative pixel values, true and false. For the linear infrastructure data of SIRIUS the OA value is 0.5. While this value  
350 seems relatively low, we need to zoom in on a specific detail: Of all 310 true road grid cells of the reference dataset showing a road infrastructure, 241 grid cells, thus 78 %, were accurately represented in the SIRIUS dataset, see Figure 7a. A visual examination further reveals, that of the remaining 69 true road grid cells supposedly not represented by SIRIUS, 45 (65 %) were captured but with a slight spatial offset (see Figure 8 A), leading to a "false negative" when indeed it was only a positional inaccuracy. Taking into account these offset grid cells, the overall accuracy of the SIRIUS dataset improves to 0.69 and the true  
355 positive value increases from 0.78 to 0.92, indicating that 92 % of the road infrastructure is mapped in the SIRIUS inventory. All of the SIRIUS road grid cells, which were not mapped in the reference dataset (false positives) were either small tracks, footways or narrow residential roads, with a width of less than 10 m and thus not mapped, see Figure 8 B.

The overall accuracy of the polygonal infrastructure and human-impacted areas of the SIRIUS dataset shows a similarly low value of 0.53. However, the true positive value, representing the ratio of correctly classified values in SIRIUS per actual positive  
360 values, is 94 % (686 of 731 true polygonal infrastructure grid cells) (Figure 7b). Of the remaining 45 false negative grid cells, 13 % were indeed missing, another 18 % occurred again because of a spatial offset, and 69 % appeared along the breakwater, protecting the shore (see Figure 9 A). OSM did not capture this structure and due to the relatively coarse spatial resolution of the Sentinel sensors, the representation of the breakwater was sparse and patchy in SACHI, leading to an underestimation and high number of false negatives. However, substantially distorting the overall accuracy is the high number of false positives: 568  
365 grid cells showed an intersection with polygonal infrastructure in the SIRIUS dataset (Figure 7b), which was not captured in the reference dataset. 23 % of these false positives stem from an overestimation of the airport area in the SACHI and an altogether more generous mapping of the area in the OSM data. The Eastern part of the runway, for instance, appears re-vegetated and allows the conclusion that it is no longer in use, despite being still represented in the OSM data (refer to Figure 9 B). Yet, the highest number of false positives originates from areas affected by human activities represented in the SIRIUS dataset. These  
370 human-impacted areas posed a challenge in accurately mapping them for the reference dataset on the basis of the orthophotos alone. Some features, for example a playground, were either not visible or difficult to delineate accurately. Figure 9 C shows an example of a human-impacted area mapped as industrial landuse by the OSM community. While the single storage structures are represented in the reference dataset, there was no indication of an enclosed area visible.



In summary, the low overall accuracy of the polygonal infrastructure data is distorted by a high number of false positives, that originate from either an overestimation of areas (e.g. airport) or a (conceptual) definition of landuse (e.g. playground, industrial usage, etc.) difficult to reproduce with orthophotos alone. However, it is important to note, that SIRIUS achieved a representation of 78 % for linear infrastructure and 94 % for polygonal infrastructure, respectively, of the true infrastructure values.

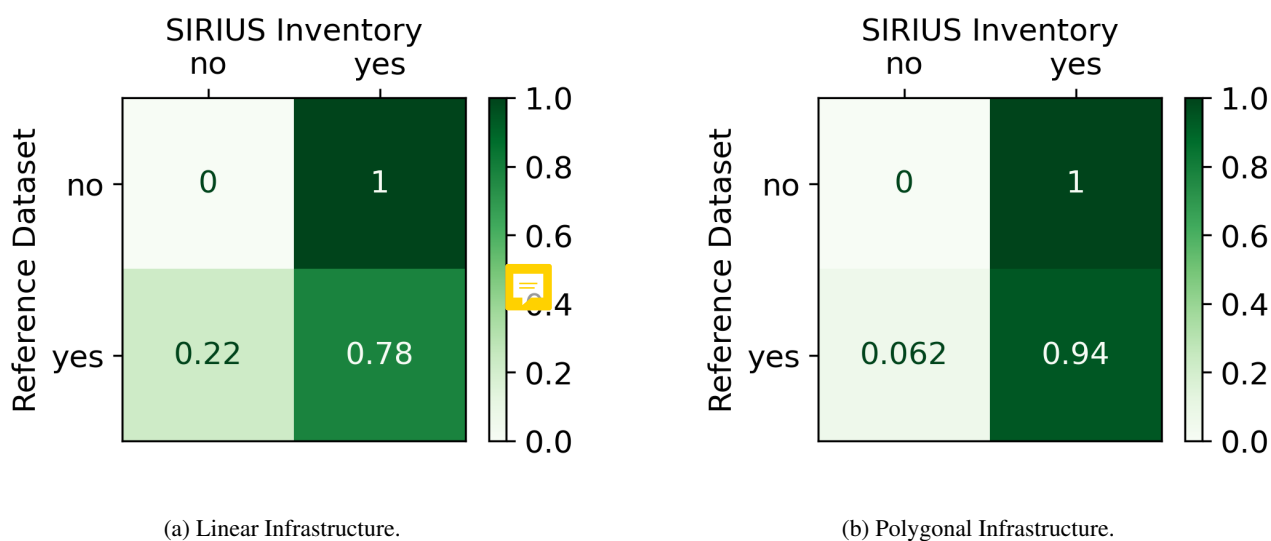

**Figure 7.** Confusion Matrices were used to evaluate the accuracy of the SIRIUS dataset. The integrated SIRIUS inventory is compared with the reference data, which was mapped on the basis of orthophotos acquired in 2021. The values of the matrices were normalized to the 'true' value, representing the ratio of SIRIUS-mapped features to true features. Figure (a) shows the accuracy of the linear infrastructure features with a true positive value of 0.78 and a false negative value of 0.22. For the polygonal infrastructure the true positive value is 0.94, deeming the SIRIUS inventory highly thorough.

### 3.1.3 Contaminated Sites of Alaska

With the text mining approach, we successfully extracted additional information from the site reports of the contaminated sites program. The use of regular expressions allowed us to identify dates, abbreviations, and references to substances from the DEC glossary or any contaminated medium mentioned in the text. Consequently, we were able to calculate the total cleanup time at inactive sites and provide a comprehensive list of substances mentioned in the site reports. By sub-sampling the data, we confirmed the successful extraction of dates, following the pattern described in Section 2.2.3. The expressions "Sites Added to Database" and "Sites Closure Approved/ Cleanup Complete" were considered as the first and last action dates, respectively. In cases where no specific expressions were present, the first and last mentioned action dates were used instead. However, we observed entries where the cleanup duration was recorded as 0 days (see Table A6), and in some instances, even negative values were reported. This again points to a heterogeneous approach or methodology used by the agency to input data into

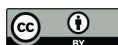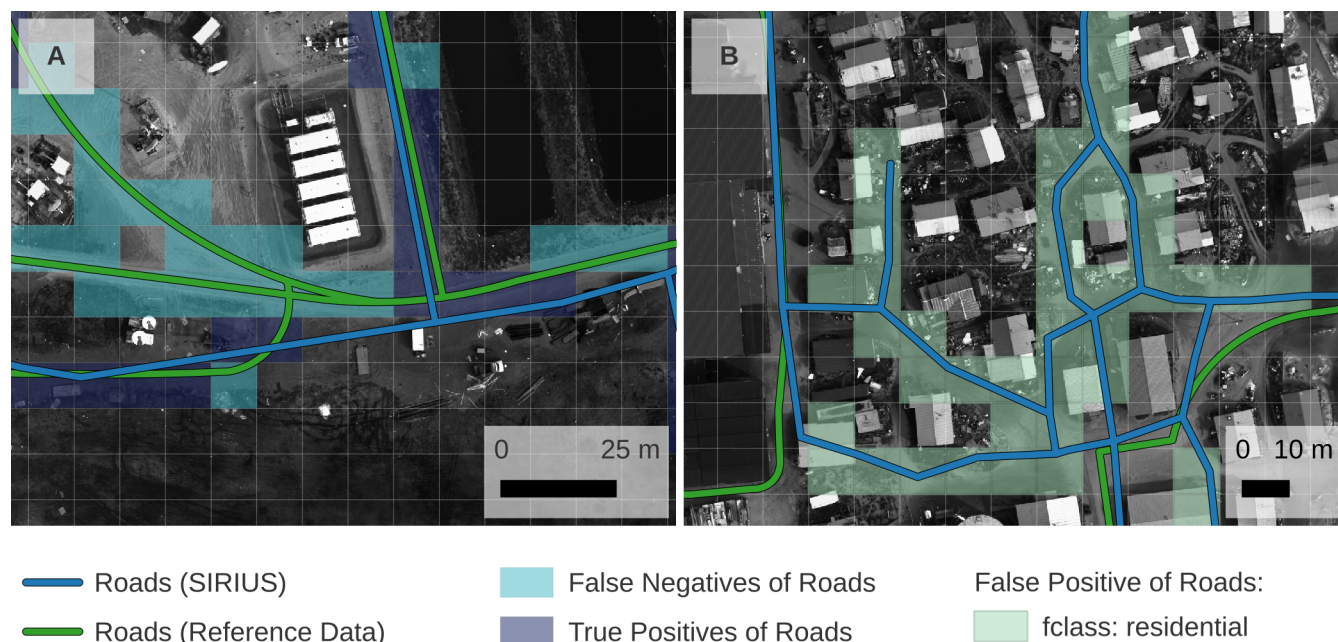

**Figure 8.** Comparison of the road network as represented in the SIRIUS inventory (integrated from OSM and SACHI from 2023 and 2021, respectively) and the reference data, which was mapped on the basis of multi-spectral (RGB + NIR) very high-resolution orthophotos from 2021. Subfigure A) showcases the presumably false negative values (0.22) of the SIRIUS road network, revealing that the roads are indeed present but exhibit a slight offset. Subfigure B) shows a section of the SIRIUS road network, which was deemed a false positive (1.0). However, the roads in SIRIUS are clearly visible on the imagery, yet they were not mapped due to their width being less than 10 m. Background imagery: orthophotos of Shishmaref, used to build the reference dataset (Rettelbach et al., 2023).

the database. In these cases, "Site Closure Approved/ Cleanup Complete" was entered on the same date or even before "Sites  
390 Added to Database." The retrieval of contaminants was highly successful, as all substances and containment structures listed  
in the DEC glossary (see Table A7) were found. However, any substances not appearing in the glossary won't be retrieved with  
our approach. Also, the information regarding the contaminated medium was limited as the DEC rarely provides details in the  
"Contaminant Information" section of the reports. Consequently, we were only able to derive the contaminated medium for  
3321 out of 8533 sites.

### 395 3.2 Data Usability

The resulting GeoPackage with our pre-processed spatial data layers contains all the input data on watersheds, permafrost  
probability, zones, and MAGT within the geographic extent of Alaska, projected to a joint spatial reference (EPSG code 5936).  
Additionally, it includes information on the contaminated sites, infrastructure features, and other human-impacted elements.  
These datasets have undergone harmonization and enrichment, specifically focusing on the retrieval of detailed land usage  
400 information and the types of contamination, duration of cleanup measures, etc., as outlined in section 2.2.1 and 2.2.3. These

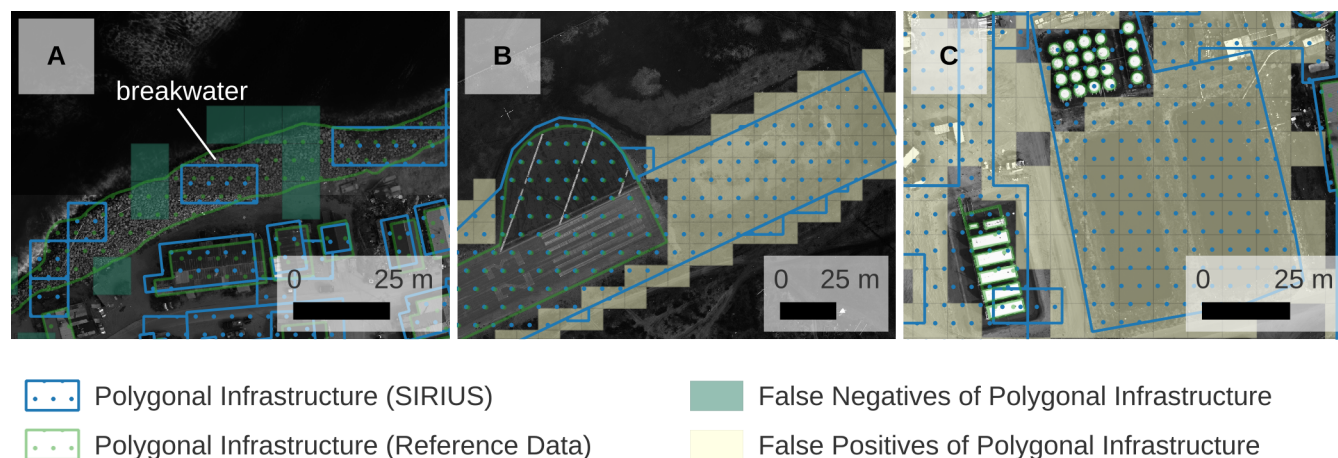

**Figure 9.** Comparison of the polygonal infrastructure and human-impacted areas as represented in the SIRIUS inventory (integrated from OSM and SACHI from 2023 and 2021, respectively) and the reference data, which was mapped on the basis of multi-spectral (RGB + NIR) very high-resolution orthophotos from 2021. Subfigure A) shows a subset of false negatives (0.06 in total) along the breakwater as a consequence of the patchy representation of this feature in SACHI. Subfigure B) displays the overestimation of the airport’s runway in the SIRIUS dataset by including a re-vegetated area seemingly no longer in use. In subfigure C) the area close to the storage features is represented as industrial landuse in SIRIUS, which could not be identified on the basis of the orthophotos alone and is thus considered a false positive. Background imagery: orthophotos of Shishmaref, used to build the reference dataset (Rettelbach et al., 2023).

datasets are now stored as separate layers (see Figure 10), eliminating the need for managing multiple Shapefiles and their auxiliary files. While retaining their original fields such as id, geometry, watershed names, etc., the files have been enriched with new information recorded in additional fields.

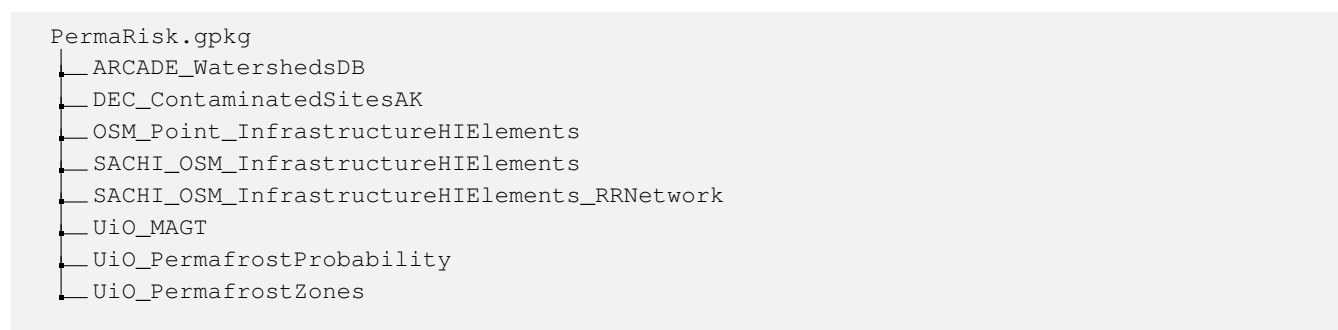

**Figure 10.** Tree structure of GeoPackage.

We deployed two GeoPackages with the same data. However, in PermaRisk\_RRNetworkLine.gpkg the rail and road network  
405 are represented as line geometries, in PermaRisk\_RRNetworkPolygonal.gpkg as polygons, based on the geometry buffers we  
defined in section 2.2.1. This allows more detailed spatial queries, such as deriving the length of a road or rail line within a



specific research domain (see section 3.2.1). Considering the different user's requirements, the GeoPackage can be imported into a spatially enabled database, such as PostgreSQL/PostGIS, loaded into a Geographic Information System (GIS) or used within geospatial processing libraries, such as Python's GeoPandas. In this section, we will showcase the use of our GeoPack-  
410 age within QGIS, perform SQL queries and access it via GeoPandas to generate exemplary statistics and explore potential application scenarios.

### 3.2.1 Application

As a first application scenario, we wanted to retrieve the total length of the road and rail lines within Alaska's continuous permafrost zone. As GeoPackage uses a SQLite database container, we could easily query spatial information by using the  
415 "Execute SQL" command in QGIS:

```
SELECT SUM(ST_Length(RRnetwork.geom) )  
FROM SACHI_OSM_InfrastructureHIElements_RRNetwork AS RRnetwork  
JOIN UiO_PermafrostZones AS permafrost  
ON ST_Intersects(RRnetwork.geom, permafrost.geom)  
420 WHERE permafrost.EXTENT = 'Cont';
```

This query provided us with a length of 8456 km for the rail and road network intersecting with the continuous permafrost zone.

Another possible application is to determine the number of contaminated sites per watershed. To achieve this, the user can for example use the QGIS tool "count points in polygon". We tested this and discovered that the Yukon watershed, which is  
425 also Alaska's largest watershed draining into the Arctic Ocean, contained the highest number of contaminated sites, totaling 2256. However, to account for the huge differences in watershed sizes and normalize the number of sites per area, we further calculated the number of contaminated sites per square kilometer per watershed, showing that the watersheds along the coast of the Beaufort Sea (Figure 11 A and C) and Kotzebue (11 B) depict the highest density of contaminated sites per square kilometer (see Figure 11).

We further derived which land use category or infrastructure type shows the most contamination. For this analysis, we showcase the use of GeoPandas as a third processing option for our GeoPackage. By creating a spatial join between the SACHI\_OSM\_InfrastructureHIElements and SACHI\_OSM\_InfrastructureHIElements\_RRNetwork (as polygonal representa-  
430 tion) layers along with the DEC\_ContaminatedSitesAK, we first derived all infrastructure and human-impacted areas and elements intersecting with a contaminated site. Next, we dissolved these intersecting elements based on their LUCAS at-  
435 tribute. Subsequently, we counted the number of contaminated sites by examining the points within these dissolved polygons, representing the aggregated LUCAS attribute. For the Python code see Appendix B.

This application example showed, that most of the contamination occurs in the land use categories "Community Services" (under which among others fall military installations, see table A), "Transport, communication networks, storage and protective works", "Industry and Manufacturing", and "Recreational, leisure and sport" (see Table 2).

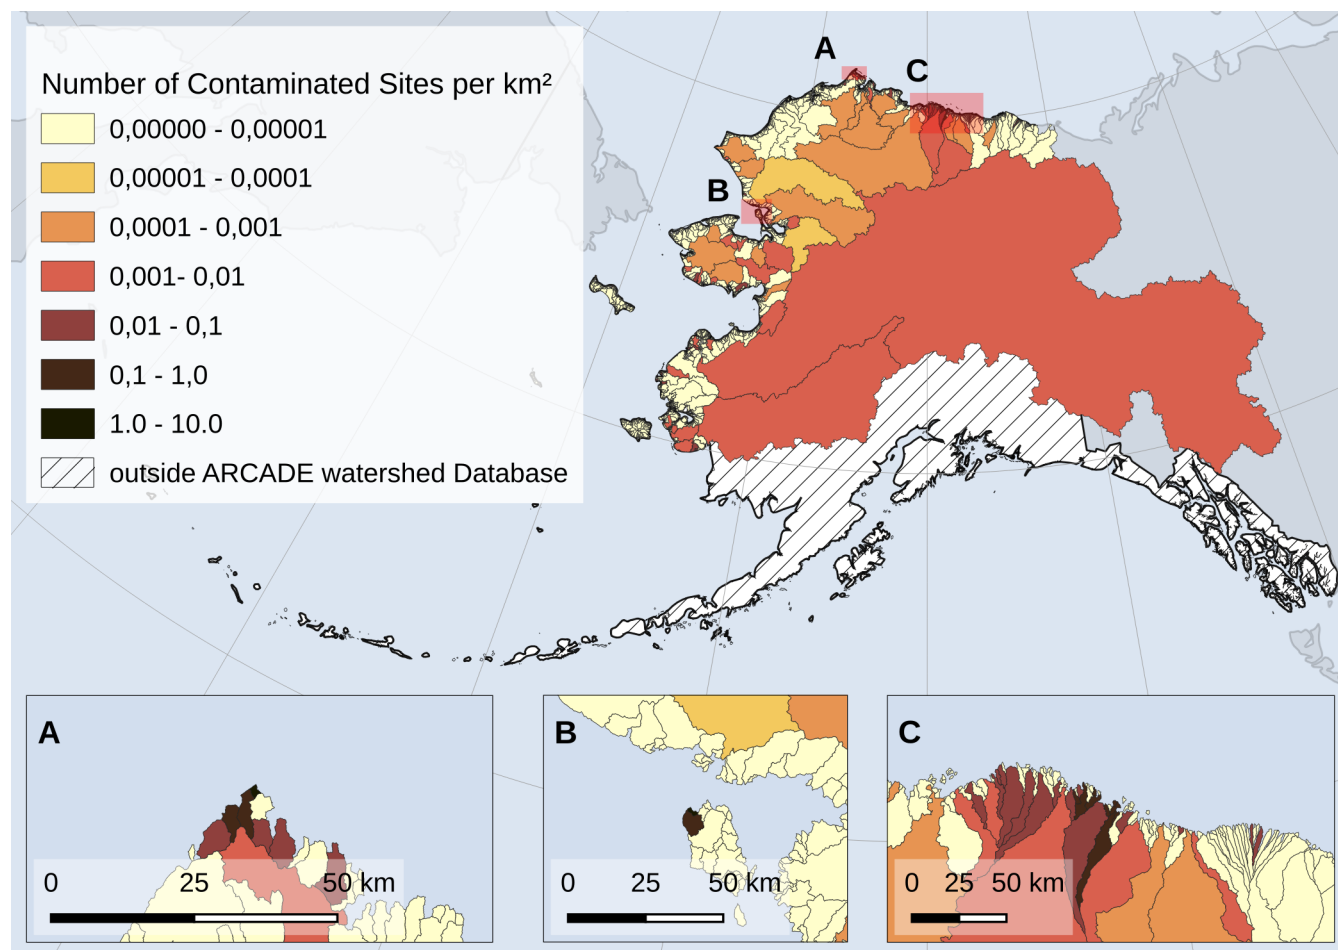

**Figure 11.** Number of contaminated sites per ARCADE watershed per square kilometer. Inset map A) shows a watershed along the coast of the Beaufort Sea with the highest value of 1.76 contaminated sites per square kilometer. Other watersheds exceeding more than one contamination per square kilometer were located in Kotzebue (inset map B) and on St. Lawrence Island. Inset map C) shows a range of watersheds of the Prudhoe Bay area. Basemap was made with Natural Earth: Free vector and raster map data @www.naturalearthdata.com.

## 440 4 Discussion

### 4.1 Data Harmonization & Mining

#### 4.1.1 Infrastructure and Human-Impacted Areas

The resulting inventory on infrastructure and human-impacted areas and elements in Alaska provides a detailed and comprehensive overview of various human activities, encompassing not only economic functions, but also recreational purposes, agricultural and commercial components, etc.. Compared to the original SACHI dataset, we have achieved higher spatial detail

445



**Table 2.** Number of contaminated sites per land use category.

| LUCAS                                                           | Nr. of Contaminated Sites |
|-----------------------------------------------------------------|---------------------------|
| Agriculture                                                     | 6                         |
| Commerce, finance and business                                  | 654                       |
| Community services                                              | 1989                      |
| Energy production                                               | 37                        |
| Fishing                                                         | 79                        |
| Forestry                                                        | 144                       |
| Industry and manufacturing                                      | 840                       |
| Mining and quarrying                                            | 32                        |
| Recreational, leisure and sport                                 | 755                       |
| Residential                                                     | 531                       |
| Transport, communication networks, storage and protective works | 1978                      |
| Unknown                                                         | 210                       |
| Water and waste treatment                                       | 11                        |

and coverage throughout the entire state by incorporating OSM data. On the other hand, the SACHI dataset has made a substantial contribution by capturing small elements that had been missed by the mapping efforts of the OSM community. This shortfall may be attributed to the peripheral status of Arctic environments within the global OSM mapping network, primarily due to their sparse population. This deficit in mapped regions underscores the necessity for infrastructure products derived from remote sensing images, such as SACHI, as the underlying algorithms used to retrieve these features remain unbiased in terms of area selection. However, as described in Section 2.2.1, the algorithms fall short in densely populated areas, which makes distinguishing between adjacent features of different classes – buildings, roads, extraction pads, etc. – challenging. To meet the spatial detail of the OSM additions, the retrieval of infrastructure and human-impacted features could be enhanced by analysing remote sensing data with sub-meter spatial resolution. However, this improvement would come at a significant cost as most of these satellite images are commercial. On a pan-Arctic scale, this approach is nearly impossible due to its expenses (Manos et al., 2022). Consequently, this emphasizes the need to rely on community-based data sources. These data sources can also be generated remotely, using accessible Web Map Servers or GIS Plugins (e.g. Bing). Using OpenStreetMap as this data source serves as a gateway for this purpose. It establishes a low threshold for non-researchers, including citizen scientists, who can not only map various elements but eventually also incorporate valuable information on contamination, that has not been captured by official environmental agencies, highlighting the unique potential of OSM in this context. In addition, this approach allows the continuous development of suitable tags (attribute "fclass" in our data). However, based on own field visits, we have identified instances where certain areas and elements that contribute to the critical sector of "health and sanitation" are not accurately represented in OSM. For example, the Middle Salt Lagoon in Barrow, which is used for sewage purposes, is labeled as "water" in OSM and is thus not included in our SIRIUS dataset. This underlines the need for a comprehensive review of the



465 mapping tags, before basing future inventories of critical infrastructure and human-impacted areas on OSM. Fortunately, due  
to OSM's open design and accessibility, these revisions can be easily implemented. Given that OSM undergoes daily updates  
through user contributions, the integration of OSM data also facilitates periodic updates within our inventory.

#### 4.1.2 Accuracy Assessment

While the linear infrastructure data exhibited low overall accuracy, about two-thirds of the false negatives resulted from a  
470 spatial offset. Thus, the information of a road's presence is indeed given, but with reduced positional accuracy. This is likely  
the result of an image offset between the MACS data and the imagery used for mapping the road network in OSM. All the false  
positive values correspond to narrow residential roads or small paths of the SIRIUS dataset. Although clearly visible in the  
orthophotos, they were not digitized for the reference dataset because the mapping adhered to the Sentinel spatial resolution  
of 10 m. Including the narrow residential roads and small footways in the reference dataset would have improved the accuracy  
475 substantially. Nonetheless, 78 % of the true road grid cells were accurately represented in the SIRIUS dataset. When accounting  
for the offset grid cells, this value increases to 92 %.

In the case of the polygonal infrastructure, the SIRIUS dataset achieves a representation of 94 % of all true values. Distorting  
the overall accuracy are the false positives, approximately a quarter of which belong to the section of the airport's runway no  
longer in use. Arguably, in this specific context and considering the potentials of contamination, it could be seen as an asset to  
480 have former land usage and industrial legacies represented in the SIRIUS dataset.

The same applies to the human-impacted areas, such as playgrounds and industrial landuse. These features can not be mapped  
on the basis of orthophotos alone but provide valuable information for assessing infrastructure critical to Arctic communities.  
Nevertheless, the polygonal infrastructure lacks a level of detail when derived from SACHI. As discussed in Section 4.1.1,  
the coarse spatial resolution of the Sentinel sensors poses a challenge in densely populated areas. In such regions, buildings  
485 and human-impacted become difficult to separate from adjacent roads. This challenge contributes to the high number of false  
positives, where roads are missclassified as buildings, and areas of human activities are overestimated. However, this issue  
could be addressed using imagery with a higher spatial resolution.

#### 4.1.3 Contaminated Sites of Alaska

We could successfully enhance the DEC contaminated sites dataset with complementary information regarding substances, the  
490 affected medium, and the duration of cleanup measurements. However, the text mining approach, using regular expressions to  
compare site reports against the DEC glossary for retrieving the contaminant and affected medium, encountered limitations  
where data was entered heterogeneously into the database (see Section 3.1.3). For instance, only 39 % of the site reports  
included information about the contaminated medium in the designated section "Contaminant Information". In addition, in  
some cases, comparing the medium keywords (soil, groundwater, etc.), against this section led to false positives as these terms  
495 are frequently used to describe the hazard level of substances. The first entry (Hazard ID 26994) of our validation sample (refer  
to Table A5), is one of these false positives. The site report actually lists "soil" as contaminated medium, but the level description  
for the substances "Benzo(a)anthracene" and "Benzo(a)pyrene" is "Between Method 2 Migration to Groundwater and Human





Health/Ingestion/Inhalation". Consequently, our approach also lists groundwater as a contaminated medium, which is not accurate. If we were to compare the full report against these keywords, it would result in even more incorrect classifications, as these terms are also employed to describe a suspicion of contamination. Furthermore, using regular expressions for the retrieval of the polluting substances, does not differentiate between the presence and absence of a contaminant, e.g. "PCB was found" vs. "PCB was not found". Although, we did not encounter statements of absent contaminants in the reports of our sample, we can not rule out the possibility of false positives of this kind.

These shortfalls could be addressed by implementing advanced text classification approaches from natural language processing and text mining. This could provide a more comprehensive understanding of toxic substances, including those not mentioned in the DEC glossary. Furthermore, these methods would extract and classify information about the contaminated medium from the entire report, rather than solely relying on the sub-sampled section labeled "Contaminant Information." Another viable alternative would be the integration of AI models, such as ChatGPT. We tested our particular false positive case (Hazard ID 26994) with ChatGPT Version 3.5. by copying the full report into the prompt and requesting: "reading this text, tell me what medium (soil, groundwater, river, lake, etc. ) was contaminated:" and it correctly classified the affected medium:

*"Based on the provided text, the medium that was contaminated is "Soil." The text mentions that soil samples collected during site assessment activities showed elevated concentrations of contaminants, specifically "benzo(a)pyrene" and "benzo(a)anthracene," which exceeded certain cleanup levels. Therefore, the contamination occurred in the soil medium."*

This way, inconsistencies in data entries and false classifications could be easily addressed.

## 4.2 Data Usability

### 4.2.1 Application

All resulting datasets have been organized as individual layers within a single GeoPackage, which is available for download from our Zenodo repository (see Section 6). The GeoPackage does not have to be extracted (e.g. like a .zip archive ) nor does it rely on the handling of multifile data formats such as Shapefiles. You can seamlessly integrate it by either opening it in a GIS application or importing it into a spatially-enabled database like PostgreSQL/PostGIS. This way, each layer can be analyzed independently or in conjunction with the others, facilitating easy querying of critical infrastructure and human-impacted areas, and their interrelation with environmental parameters.

To achieve a more comprehensive understanding of the implications of the socio-economic implications of permafrost degradation, we advocate to incorporate additional environmental data, such as soil and waterbody databases, which are important for assessing the contamination severity and the significance of waterbodies as water resources. Additionally, incorporating demographic factors like age distribution, education, employment, and income numbers can provide valuable insights into the impacts of permafrost degradation on the population's well-being.



## 5 Conclusions

The SIRIUS dataset offers a comprehensive inventory of critical infrastructure and human-impacted areas in Alaska. It enables researchers and local communities to explore data in a spatial context, providing valuable information on permafrost extent, permafrost probability, mean annual ground temperatures, and watersheds, allowing for an in-depth analyses of their interdependences.  
530

By combining the OSM and SACHI datasets, the information content regarding the type of infrastructure usage was greatly improved, increasing the number of usage categories from five (under SACHI) to a total of 13. The new usage categories now go beyond industrial and other economically important infrastructure by distinguishing elements of health care, food and water supply, sanitation, and areas of cultural heritage that are crucial to the well-being of local communities. Leveraging the OSM data and internally overlaying building features with non-building-features, we were also able to decrease the number of buildings with unknown usage type by 63 % (from 34.15 km<sup>2</sup> to 12.58 km<sup>2</sup>).  
535

As we move forward, further enhancements of text classification methods and infrastructure data detail, will solidify the SIRIUS dataset as a foundational resource for pan-Arctic multi-source synthesis and data integration initiatives. The integration of OpenStreetMap into the Land Use / Cover Area frame statistical Survey (LUCAS) framework not only promotes harmonization across international boundaries but also opens avenues for automated and regularly updated data retrieval through Python libraries like OMSnx (Boeing, 2017). Leveraging crowd-sourced data can encourage future mapping endeavors, including the identification of previously unregistered contamination sources. This approach also allows the continuous and unrestricted expansion of the SIRIUS dataset, with the capacity to assist decision-makers in effectively managing risks associated with permafrost degradation.  
540

## 545 6 Code and data availability

The GeoPackage and Python code are available from <https://doi.org/10.5281/zenodo.8311243> (Kaiser et al., 2023) (accessed on September 25, 2023).



## Appendix A: Tables

**Table A1.** Synthesized datasets and their date of acquisition.

| Dataset                                                                    | Date of Acquisition |
|----------------------------------------------------------------------------|---------------------|
| Sentinel-1/2 derived Arctic Coastal Human Impact                           | June 11, 2021       |
| OpenStreetMap                                                              | January 20, 2023    |
| Pan-Arctic Catchments Summary Database                                     | January 17, 2023    |
| Northern Hemisphere Permafrost Map                                         | August 31, 2023     |
| Alaska Department of Environmental Conservation Contaminated Sites Program | March 2, 2023       |

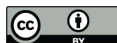

Table A2: Assigning OSM keys and values to the "fclass" and "osm\_type" attributes of the OSM Shapefiles, followed by LUCAS categorization.

| fclass         | osm_type | OSM_key                                     | OSM_value           | LUCAS                                  |
|----------------|----------|---------------------------------------------|---------------------|----------------------------------------|
| airfield       | NaN      | military                                    | airfield            | Community services                     |
| airport        | NaN      | aeroway                                     | aerodrome           | Transport, communication networks, ... |
| allotments     | NaN      | landuse                                     | allotments          | Residential                            |
| allotments     | NaN      | place                                       | allotments          | Residential                            |
| alpine_hut     | NaN      | tourism                                     | alpine_hut          | Recreational, leisure and sport        |
| apron          | NaN      | aeroway                                     | apron               | Transport, communication networks, ... |
| archaeological | NaN      | Historic                                    | archaeological_site | Community services                     |
| arts_centre    | NaN      | amenity (Entertainment, Arts & Culture)     | arts_centre         | Recreational, leisure and sport        |
| artwork        | NaN      | tourism                                     | artwork             | Recreational, leisure and sport        |
| atm            | NaN      | amenity (financial)                         | atm                 | Commerce, finance and business         |
| attraction     | NaN      | tourism                                     | attraction          | Recreational, leisure and sport        |
| bakery         | NaN      | shop (food & beverages)                     | bakery              | Commerce, finance and business         |
| bank           | NaN      | amenity (financial)                         | bank                | Commerce, finance and business         |
| bar            | NaN      | amenity (Sustenance)                        | bar                 | Recreational, leisure and sport        |
| beauty_shop    | NaN      | shop (Health and beauty)                    | beauty              | Commerce, finance and business         |
| bench          | NaN      | amenity (facilities)                        | bench               | Community services                     |
| beverages      | NaN      | shop (food & beverages)                     | beverages           | Commerce, finance and business         |
| bicycle_rental | NaN      | amenity (transportation)                    | bicycle_rental      | Transport, communication networks, ... |
| bicycle_shop   | NaN      | shop (Outdoors and sport, vehicles)         | bicycle             | Commerce, finance and business         |
| biergarten     | NaN      | amenity (Sustenance)                        | biergarten          | Recreational, leisure and sport        |
| bookshop       | NaN      | shop (Stationery, gifts, books, newspapers) | books               | Commerce, finance and business         |
| building       | NaN      | NaN                                         | NaN                 | NaN                                    |
| bus_station    | NaN      | amenity (transportation)                    | bus_station         | Transport, communication networks, ... |



Continuation of Table A2

| fclass              | osm_type | OSM_key                                 | OSM_value            | LUCAS                                  |
|---------------------|----------|-----------------------------------------|----------------------|----------------------------------------|
| bus_stop            | NaN      | highway (other highway features)        | bus_stop             | Transport, communication networks, ... |
| butcher             | NaN      | shop (food & beverages)                 | butcher              | Commerce, finance and business         |
| cafe                | NaN      | amenity (Sustenance)                    | cafe                 | Recreational, leisure and sport        |
| camera_surveillance | NaN      | man_made                                | surveillance         | Transport, communication networks, ... |
| camp_site           | NaN      | tourism                                 | camp_site            | Recreational, leisure and sport        |
| car_dealership      | NaN      | shop (Outdoors and sport, vehicles)     | car                  | Commerce, finance and business         |
| car_rental          | NaN      | amenity (transportation)                | car_rental           | Transport, communication networks, ... |
| car_wash            | NaN      | amenity (transportation)                | car_wash             | Transport, communication networks, ... |
| caravan_site        | NaN      | tourism                                 | caravan_site         | Recreational, leisure and sport        |
| cemetery            | NaN      | landuse                                 | cemetery             | Community services                     |
| chalet              | NaN      | tourism                                 | chalet               | Recreational, leisure and sport        |
| chemist             | NaN      | shop (Health and beauty)                | chemist              | Commerce, finance and business         |
| cinema              | NaN      | amenity (Entertainment, Arts & Culture) | cinema               | Recreational, leisure and sport        |
| city                | NaN      | NaN                                     | NaN                  | (removed)                              |
| clinic              | NaN      | amenity (healthcare)                    | clinic               | Community services                     |
| clothes             | NaN      | shop (Clothing, shoes, accessories)     | clothes              | Commerce, finance and business         |
| college             | NaN      | amenity (education)                     | college              | Community services                     |
| college             | NaN      | building                                | college              | Community services                     |
| commercial          | NaN      | building                                | commercial           | Commerce, finance and business         |
| commercial          | NaN      | landuse                                 | commercial           | Commerce, finance and business         |
| comms_tower         | NaN      | man_made                                | communications_tower | Transport, communication networks, ... |



Continuation of Table A2

| fclass           | osm_type | OSM_key                                             | OSM_value        | LUCAS                                  |
|------------------|----------|-----------------------------------------------------|------------------|----------------------------------------|
| community_centre | NaN      | amenity (Entertainment, Arts & Culture)             | community_centre | Recreational, leisure and sport        |
| computer_shop    | NaN      | shop (Electronics)                                  | computer         | Commerce, finance and business         |
| convenience      | NaN      | shop (food & beverages)                             | convenience      | Commerce, finance and business         |
| county           | NaN      | NaN                                                 | NaN              | (removed)                              |
| courthouse       | NaN      | amenity (Public Service)                            | courthouse       | Community services                     |
| crossing         | NaN      | footway                                             | crossing         | Transport, communication networks, ... |
| crossing         | NaN      | highway (other highway features)                    | crossing         | Transport, communication networks, ... |
| crossing         | NaN      | railway                                             | crossing         | Transport, communication networks, ... |
| dam              | NaN      | waterway (Barriers on waterways)                    | dam              | Community services                     |
| dentist          | NaN      | amenity (healthcare )                               | dentist          | Community services                     |
| department_store | NaN      | shop (General store, department store, mall)        | department_store | Commerce, finance and business         |
| doctors          | NaN      | amenity (healthcare )                               | doctors          | Community services                     |
| dog_park         | NaN      | leisure                                             | dog_park         | Recreational, leisure and sport        |
| doityourself     | NaN      | shop (Do-it-yourself, household, building mater...) | doityourself     | Commerce, finance and business         |
| drinking_water   | NaN      | amenity (facilities)                                | drinking_water   | Community services                     |
| drinking_water   | NaN      | emergency                                           | drinking_water   | Community services                     |
| embassy          | NaN      | office                                              | diplomatic       | Community services                     |
| farmland         | NaN      | landuse                                             | farmland         | Agriculture                            |
| farmyard         | NaN      | landuse                                             | farmyard         | Agriculture                            |
| fast_food        | NaN      | amenity (Sustenance)                                | fast_food        | Recreational, leisure and sport        |
| ferry_terminal   | NaN      | amenity (transportation)                            | ferry_terminal   | Transport, communication networks, ... |



Continuation of Table A2

| fclass         | osm_type | OSM_key                                                 | OSM_value     | LUCAS                                  |
|----------------|----------|---------------------------------------------------------|---------------|----------------------------------------|
| fire_station   | NaN      | amenity (Public Service)                                | fire_station  | Community services                     |
| fire_station   | NaN      | building                                                | fire_station  | Community services                     |
| florist        | NaN      | shop (Do-it-yourself, house-<br>hold, building mater... | florist       | Commerce, finance and business         |
| food_court     | NaN      | amenity (Sustenance)                                    | food_court    | Recreational, leisure and sport        |
| forest         | NaN      | boundary                                                | forest        | Forestry                               |
| forest         | NaN      | landuse                                                 | forest        | Forestry                               |
| fort           | NaN      | Historic                                                | fort          | Community services                     |
| fountain       | NaN      | amenity (Entertainment,<br>Arts & Culture)              | fountain      | Recreational, leisure and sport        |
| fuel           | NaN      | amenity (transportation)                                | fuel          | Transport, communication networks, ... |
| fuel           | NaN      | waterway                                                | fuel          | Transport, communication networks, ... |
| furniture_shop | NaN      | shop (Furniture and interior)                           | furniture     | Commerce, finance and business         |
| garden_centre  | NaN      | shop (Do-it-yourself, house-<br>hold, building mater... | garden_centre | Commerce, finance and business         |
| general        | NaN      | shop (General store, depart-<br>ment store, mall)       | general       | Commerce, finance and business         |
| gift_shop      | NaN      | shop (Stationery, gifts,<br>books, newspapers)          | gift          | Commerce, finance and business         |
| golf_course    | NaN      | NaN                                                     | none          | Recreational, leisure and sport        |
| grass          | NaN      | landuse                                                 | grass         | Community services                     |
| graveyard      | NaN      | amenity (Others)                                        | grave_yard    | Community services                     |
| greengrocer    | NaN      | shop (food & beverages)                                 | greengrocer   | Commerce, finance and business         |
| guesthouse     | NaN      | tourism                                                 | guest_house   | Recreational, leisure and sport        |
| hairdresser    | NaN      | shop (Health and beauty)                                | hairdresser   | Commerce, finance and business         |
| hamlet         | NaN      | NaN                                                     | NaN           | (removed)                              |



Continuation of Table A2

| fclass        | osm_type | OSM_key                                      | OSM_value     | LUCAS                                  |
|---------------|----------|----------------------------------------------|---------------|----------------------------------------|
| heath         | NaN      | NaN                                          | NaN           | (removed)                              |
| helipad       | NaN      | aeroway                                      | helipad       | Transport, communication networks, ... |
| hospital      | NaN      | amenity (healthcare )                        | hospital      | Community services                     |
| hospital      | NaN      | building                                     | hospital      | Community services                     |
| hostel        | NaN      | tourism                                      | hostel        | Recreational, leisure and sport        |
| hotel         | NaN      | building                                     | hotel         | Recreational, leisure and sport        |
| hotel         | NaN      | tourism                                      | hotel         | Recreational, leisure and sport        |
| hunting_stand | NaN      | amenity (Others)                             | hunting_stand | Hunting                                |
| ice_rink      | NaN      | leisure                                      | ice_rink      | Recreational, leisure and sport        |
| industrial    | NaN      | building                                     | industrial    | Industry and manufacturing             |
| industrial    | NaN      | landuse                                      | industrial    | Industry and manufacturing             |
| industrial    | NaN      | usage                                        | industrial    | Industry and manufacturing             |
| island        | NaN      | NaN                                          | NaN           | (removed)                              |
| jeweller      | NaN      | shop (Clothing, shoes, accessories)          | jeweller      | Commerce, finance and business         |
| jeweller      | NaN      | shop (Clothing, shoes, accessories)          | jewelry       | Commerce, finance and business         |
| kindergarten  | NaN      | amenity (education)                          | kindergarten  | Community services                     |
| kindergarten  | NaN      | building                                     | kindergarten  | Community services                     |
| kiosk         | NaN      | building                                     | kiosk         | Commerce, finance and business         |
| laundry       | NaN      | shop (others)                                | laundry       | Commerce, finance and business         |
| library       | NaN      | amenity (education)                          | library       | Community services                     |
| lighthouse    | NaN      | man_made                                     | lighthouse    | Community services                     |
| locality      | NaN      | NaN                                          | NaN           | (removed)                              |
| mall          | NaN      | shop (General store, department store, mall) | mall          | Commerce, finance and business         |



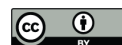

Continuation of Table A2

| fclass            | osm_type | OSM_key                                        | OSM_value         | LUCAS                                  |
|-------------------|----------|------------------------------------------------|-------------------|----------------------------------------|
| marina            | NaN      | leisure                                        | marina            | Recreational, leisure and sport        |
| market_place      | NaN      | amenity (Others)                               | marketplace       | Commerce, finance and business         |
| meadow            | NaN      | landuse                                        | meadow            | Agriculture                            |
| memorial          | NaN      | Historic                                       | memorial          | Community services                     |
| military          | NaN      | building                                       | military          | Community services                     |
| military          | NaN      | landuse                                        | military          | Community services                     |
| military          | NaN      | usage                                          | military          | Community services                     |
| mini_roundabout   | NaN      | highway (other highway fea-<br>tures)          | mini_roundabout   | Transport, communication networks, ... |
| mobile_phone_shop | NaN      | shop (Electronics)                             | mobile_phone      | Commerce, finance and business         |
| monument          | NaN      | Historic                                       | monument          | Community services                     |
| motel             | NaN      | tourism                                        | motel             | Recreational, leisure and sport        |
| motorway_junction | NaN      | highway (other highway fea-<br>tures)          | motorway_junction | Transport, communication networks, ... |
| museum            | NaN      | tourism                                        | museum            | Recreational, leisure and sport        |
| nature_reserve    | NaN      | leisure                                        | nature_reserve    | Recreational, leisure and sport        |
| newsagent         | NaN      | shop (Stationery, gifts,<br>books, newspapers) | newsagent         | Commerce, finance and business         |
| nightclub         | NaN      | amenity (Entertainment,<br>Arts & Culture)     | nightclub         | Recreational, leisure and sport        |
| observation_tower | NaN      | NaN                                            | none              | Community services                     |
| optician          | NaN      | shop (Health and beauty)                       | optician          | Commerce, finance and business         |
| orchard           | NaN      | landuse                                        | orchard           | Agriculture                            |
| outdoor_shop      | NaN      | shop (Outdoors and sport,<br>vehicles)         | outdoor           | Commerce, finance and business         |
| park              | NaN      | leisure                                        | park              | Recreational, leisure and sport        |



Continuation of Table A2

| fclass              | osm_type | OSM_key                    | OSM_value         | LUCAS                                  |
|---------------------|----------|----------------------------|-------------------|----------------------------------------|
| parking             | NaN      | amenity (transportation)   | parking           | Transport, communication networks, ... |
| parking             | NaN      | building                   | parking           | Transport, communication networks, ... |
| parking_bicycle     | NaN      | amenity (transportation)   | bicycle_parking   | Transport, communication networks, ... |
| parking_multistorey | NaN      | NaN                        | none              | Transport, communication networks, ... |
| parking_underground | NaN      | NaN                        | none              | Transport, communication networks, ... |
| pharmacy            | NaN      | amenity (healthcare )      | pharmacy          | Community services                     |
| picnic_site         | NaN      | tourism                    | picnic_site       | Recreational, leisure and sport        |
| pier                | NaN      | man_made                   | pier              | Community services                     |
| pitch               | NaN      | leisure                    | pitch             | Recreational, leisure and sport        |
| playground          | NaN      | leisure                    | playground        | Recreational, leisure and sport        |
| police              | NaN      | amenity (Public Service)   | police            | Community services                     |
| post_box            | NaN      | amenity (Public Service)   | post_box          | Community services                     |
| post_office         | NaN      | amenity (Public Service)   | post_office       | Community services                     |
| prison              | NaN      | amenity (Public Service)   | prison            | Community services                     |
| pub                 | NaN      | amenity (Sustenance)       | pub               | Recreational, leisure and sport        |
| public_building     | NaN      | man_made                   | public_building   | Community services                     |
| quarry              | NaN      | landuse                    | quarry            | Mining and quarrying                   |
| railway_halt        | NaN      | railway                    | halt              | Transport, communication networks, ... |
| railway_station     | NaN      | railway                    | station           | Transport, communication networks, ... |
| recreation_ground   | NaN      | landuse                    | recreation_ground | Recreational, leisure and sport        |
| recycling           | NaN      | amenity (waste management) | recycling         | Water and waste treatment              |
| recycling_clothes   | NaN      | NaN                        | none              | Water and waste treatment              |
| recycling_glass     | NaN      | NaN                        | none              | Water and waste treatment              |
| recycling_metal     | NaN      | NaN                        | none              | Water and waste treatment              |
| recycling_paper     | NaN      | NaN                        | none              | Water and waste treatment              |



Continuation of Table A2

| fclass        | osm_type | OSM_key                               | OSM_value     | LUCAS                                  |
|---------------|----------|---------------------------------------|---------------|----------------------------------------|
| residential   | NaN      | building                              | residential   | Residential                            |
| residential   | NaN      | highway                               | residential   | Residential                            |
| residential   | NaN      | landuse                               | residential   | Residential                            |
| restaurant    | NaN      | amenity (Sustenance)                  | restaurant    | Recreational, leisure and sport        |
| retail        | NaN      | building                              | retail        | Commerce, finance and business         |
| retail        | NaN      | landuse                               | retail        | Commerce, finance and business         |
| ruins         | NaN      | building                              | ruins         | Community services                     |
| ruins         | NaN      | Historic                              | ruins         | Community services                     |
| school        | NaN      | amenity (education)                   | school        | Community services                     |
| school        | NaN      | building                              | school        | Community services                     |
| school        | NaN      | military                              | school        | Community services                     |
| scrub         | NaN      | NaN                                   | NaN           | (removed)                              |
| service       | NaN      | building (power/ technical buildings) | service       | unknown                                |
| service       | NaN      | highway (Special road types)          | service       | unknown                                |
| shelter       | NaN      | amenity (facilities)                  | shelter       | Community services                     |
| shoe_shop     | NaN      | shop (Clothing, shoes, accessories)   | shoes         | Commerce, finance and business         |
| slipway       | NaN      | leisure                               | slipway       | Recreational, leisure and sport        |
| speed_camera  | NaN      | highway (other highway features)      | speed_camera  | Transport, communication networks, ... |
| sports_centre | NaN      | leisure                               | sports_centre | Recreational, leisure and sport        |
| sports_shop   | NaN      | shop (Outdoors and sport, vehicles)   | sports        | Commerce, finance and business         |
| stadium       | NaN      | building                              | stadium       | Recreational, leisure and sport        |



Continuation of Table A2

| fclass        | osm_type | OSM_key                                      | OSM_value     | LUCAS                                  |
|---------------|----------|----------------------------------------------|---------------|----------------------------------------|
| stadium       | NaN      | leisure                                      | stadium       | Recreational, leisure and sport        |
| stationery    | NaN      | shop (Stationery, books, newspapers)         | stationery    | Commerce, finance and business         |
| stop          | NaN      | highway (other highway features)             | stop          | Transport, communication networks, ... |
| street_lamp   | NaN      | highway (other highway features)             | street_lamp   | Transport, communication networks, ... |
| suburb        | NaN      | NaN                                          | NaN           | (removed)                              |
| supermarket   | NaN      | building                                     | supermarket   | Commerce, finance and business         |
| supermarket   | NaN      | shop (General store, department store, mall) | supermarket   | Commerce, finance and business         |
| swimming_pool | NaN      | leisure                                      | swimming_pool | Recreational, leisure and sport        |
| taxi          | NaN      | amenity (transportation)                     | taxi          | Transport, communication networks, ... |
| telephone     | NaN      | amenity (facilities)                         | telephone     | Community services                     |
| theatre       | NaN      | amenity (Entertainment, Arts & Culture)      | theatre       | Recreational, leisure and sport        |
| theme_park    | NaN      | tourism                                      | theme_park    | Recreational, leisure and sport        |
| toilet        | NaN      | amenity (facilities)                         | toilets       | Community services                     |
| toilet        | NaN      | building                                     | toilets       | Community services                     |
| tourist_info  | NaN      | tourism                                      | information   | Recreational, leisure and sport        |
| tower         | NaN      | Historic                                     | tower         | unknown                                |
| tower         | NaN      | lifeguard                                    | tower         | unknown                                |
| tower         | NaN      | man_made                                     | tower         | unknown                                |
| tower         | NaN      | power                                        | tower         | unknown                                |
| town          | NaN      | NaN                                          | NaN           | (removed)                              |
| town_hall     | NaN      | amenity (Public Service)                     | townhall      | Community services                     |



Continuation of Table A2

| fclass           | osm_type | OSM_key                          | OSM_value        | LUCAS                                  |
|------------------|----------|----------------------------------|------------------|----------------------------------------|
| toy_shop         | NaN      | shop (others)                    | toys             | Commerce, finance and business         |
| track            | NaN      | leisure                          | track            | Recreational, leisure and sport        |
| traffic_signals  | NaN      | highway (other highway features) | traffic_signals  | Transport, communication networks, ... |
| travel_agent     | NaN      | office                           | travel_agent     | Commerce, finance and business         |
| turning_circle   | NaN      | highway (other highway features) | turning_circle   | Transport, communication networks, ... |
| university       | NaN      | amenity (education)              | university       | Community services                     |
| university       | NaN      | building                         | university       | Community services                     |
| vending_any      | NaN      | NaN                              | none             | unknown                                |
| vending_machine  | NaN      | amenity (Others)                 | vending_machine  | unknown                                |
| vending_parking  | NaN      | NaN                              | none             | Transport, communication networks, ... |
| veterinary       | NaN      | amenity (healthcare)             | veterinary       | Community services                     |
| video_shop       | NaN      | shop (Art, music, hobbies)       | video            | Commerce, finance and business         |
| viewpoint        | NaN      | tourism                          | viewpoint        | Recreational, leisure and sport        |
| village          | NaN      | NaN                              | NaN              | (removed)                              |
| waste_basket     | NaN      | amenity (waste management)       | waste_basket     | Water and waste treatment              |
| wastewater_plant | NaN      | man_made                         | wastewater_plant | Water and waste treatment              |
| water_tower      | NaN      | building                         | water_tower      | Water and waste treatment              |
| water_tower      | NaN      | man_made                         | water_tower      | Water and waste treatment              |
| water_well       | NaN      | man_made                         | water_well       | Water and waste treatment              |
| water_works      | NaN      | man_made                         | water_works      | Water and waste treatment              |
| waterfall        | NaN      | NaN                              | NaN              | (removed)                              |
| wayside_cross    | NaN      | Historic                         | wayside_cross    | Community services                     |



Continuation of Table A2

| fclass   | osm_type             | OSM_key                               | OSM_value    | LUCAS                                  |
|----------|----------------------|---------------------------------------|--------------|----------------------------------------|
| weir     | NaN                  | waterway (Barriers on wa-<br>terways) | weir         | Community services                     |
| windmill | NaN                  | man_made                              | windmill     | Community services                     |
| zoo      | NaN                  | tourism                               | zoo          | Recreational, leisure and sport        |
| NaN      | Dump Station         | NaN                                   | none         | Water and waste treatment              |
| NaN      | amphitheatre         | NaN                                   | none         | Recreational, leisure and sport        |
| NaN      | apartments           | building                              | apartments   | Residential                            |
| NaN      | barn                 | building                              | barn         | Agriculture                            |
| NaN      | boathouse            | NaN                                   | none         | Transport, communication networks, ... |
| NaN      | bridge               | building                              | bridge       | Transport, communication networks, ... |
| NaN      | bungalow             | building                              | bungalow     | Residential                            |
| NaN      | bunker               | building                              | bunker       | Community services                     |
| NaN      | cabin                | building                              | cabin        | Residential                            |
| NaN      | carport              | building                              | carport      | Residential                            |
| NaN      | cathedral            | building                              | cathedral    | Community services                     |
| NaN      | chapel               | building                              | chapel       | Community services                     |
| NaN      | church               | building                              | church       | Community services                     |
| NaN      | civic                | building                              | civic        | Community services                     |
| NaN      | classrooms           | NaN                                   | none         | Community services                     |
| NaN      | commercial;apartment | NaN                                   | none         | unknown                                |
| NaN      | construction         | building                              | construction | Construction                           |
| NaN      | construction         | landuse                               | construction | Construction                           |
| NaN      | container            | NaN                                   | none         | Transport, communication networks, ... |
| NaN      | cowshed              | building                              | cowshed      | Agriculture                            |
| NaN      | detached             | building                              | detached     | Residential                            |
| NaN      | disused              | NaN                                   | none         | Unused                                 |



Continuation of Table A2

| fclass | osm_type          | OSM_key  | OSM_value      | LUCAS                                  |
|--------|-------------------|----------|----------------|----------------------------------------|
| NaN    | dormitory         | building | dormitory      | Community services                     |
| NaN    | farm              | building | farm           | Agriculture                            |
| NaN    | farm_auxiliary    | building | farm_auxiliary | Agriculture                            |
| NaN    | fire_station      | building | fire_station   | Community services                     |
| NaN    | garage            | building | garage         | Residential                            |
| NaN    | garages           | building | garages        | Transport, communication networks, ... |
| NaN    | gazebo            | NaN      | none           | Community services                     |
| NaN    | government        | building | government     | Community services                     |
| NaN    | grandstand        | building | grandstand     | Recreational, leisure and sport        |
| NaN    | greenhouse        | building | greenhouse     | Agriculture                            |
| NaN    | hangar            | building | hangar         | Transport, communication networks, ... |
| NaN    | historic          | NaN      | none           | Community services                     |
| NaN    | house             | building | house          | Residential                            |
| NaN    | houseboat         | building | houseboat      | Residential                            |
| NaN    | hut               | building | hut            | Transport, communication networks, ... |
| NaN    | lodge             | NaN      | none           | Recreational, leisure and sport        |
| NaN    | manufacture       | NaN      | none           | Industry and manufacturing             |
| NaN    | mil               | building | military       | Community services                     |
| NaN    | monastery         | building | monastery      | Community services                     |
| NaN    | no                | NaN      | none           | unknown                                |
| NaN    | office            | building | office         | Commerce, finance and business         |
| NaN    | pavilion          | building | pavilion       | Recreational, leisure and sport        |
| NaN    | public            | building | public         | Community services                     |
| NaN    | radio_station     | NaN      | none           | Transport, communication networks, ... |
| NaN    | railway_shed      | NaN      | none           | Transport, communication networks, ... |
| NaN    | recreation_center | NaN      | none           | Recreational, leisure and sport        |



Continuation of Table A2

| fclass | osm_type           | OSM_key              | OSM_value          | LUCAS                                  |
|--------|--------------------|----------------------|--------------------|----------------------------------------|
| NaN    | religious          | building             | religious          | Community services                     |
| NaN    | roof               | building             | roof               | unknown                                |
| NaN    | roof;office        | NaN                  | none               | unknown                                |
| NaN    | sauna              | NaN                  | none               | Recreational, leisure and sport        |
| NaN    | semidetached_house | building             | semidetached_house | Residential                            |
| NaN    | shed               | building             | shed               | Transport, communication networks, ... |
| NaN    | ship               | NaN                  | none               | Transport, communication networks, ... |
| NaN    | sports_hall        | building             | sports_hall        | Recreational, leisure and sport        |
| NaN    | stable             | building             | stable             | Agriculture                            |
| NaN    | static_caravan     | building             | static_caravan     | Recreational, leisure and sport        |
| NaN    | storage            | NaN                  | none               | Transport, communication networks, ... |
| NaN    | storage_tank       | building             | storage_tank       | Transport, communication networks, ... |
| NaN    | strip mall         | NaN                  | none               | Commerce, finance and business         |
| NaN    | tent               | building             | tent               | Community services                     |
| NaN    | terminal           | aeroway              | terminal           | Transport, communication networks, ... |
| NaN    | terrace            | building             | terrace            | Residential                            |
| NaN    | toilets            | amenity (facilities) | toilets            | Community services                     |
| NaN    | toilets            | building             | toilets            | Community services                     |
| NaN    | tower_block        | NaN                  | none               | unknown                                |
| NaN    | train_station      | building             | train_station      | Transport, communication networks, ... |
| NaN    | transmitter        | NaN                  | none               | Transport, communication networks, ... |
| NaN    | transportation     | building             | transportation     | Transport, communication networks, ... |
| NaN    | wall               | barrier              | wall               | unknown                                |
| NaN    | warehouse          | building             | warehouse          | Commerce, finance and business         |
| NaN    | yert               | building             | ger                | Community services                     |
| NaN    | NaN                | NaN                  | none               | unknown                                |





| Continuation of Table A2 |          |         |           |
|--------------------------|----------|---------|-----------|
| fclass                   | osm_type | OSM_key | OSM_value |
|                          |          |         | LUCAS     |
| End of Table A2          |          |         |           |



**Table A3.** Assigning use categories of SACHI dataset to LUCAS classification

| SACHI.Use_main | SACHI.Use         | LUCAS                           |
|----------------|-------------------|---------------------------------|
| Fishing        | Fishing           | Fishing                         |
| Fishing        | Fishing, Tourism  | Fishing                         |
| Mining         | Mining            | Mining and quarrying            |
| Mining         | Quartz Mining     | Mining and quarrying            |
| Mining         | Gold Mining       | Mining and quarrying            |
| other          | NaN               | NaN                             |
| Gas/Oil        | Gas, Oil, Tourism | Energy production               |
| Gas/Oil        | Gas, Oil          | Energy production               |
| Military       | Military          | Community services              |
| NaN            | Historical        | Community services              |
| NaN            | Tourism           | Recreational, leisure and sport |
| NaN            | NaN               | NaN                             |
| NaN            | unknown           | NaN                             |



**Table A4.** Improvement of spatial coverage and usage type categorization. Area [km<sup>2</sup>] per LUCAS category for (i) the original SACHI dataset (only coastal areas), (ii) OSM before and (iii) after the internal overlay (complete extent of Alaska), and (iv) after combining both datasets within our inventory of critical infrastructure and human-impacted areas. For a visualization, see Figure 6.

|                                                                 | SACHI (original)        | OSM before internal overlay                                                                          | OSM after internal overlay | Joint IS & HI elements |
|-----------------------------------------------------------------|-------------------------|------------------------------------------------------------------------------------------------------|----------------------------|------------------------|
| Spatial Extent                                                  | Coastal Areas of Alaska | Entire State of Alaska, including the Alaskan Peninsula and Aleutian Islands, and the Inside Passage |                            |                        |
| Total Area [km <sup>2</sup> ]                                   | 62                      | 641631                                                                                               | 641631                     | 640593                 |
| Area per category [km <sup>2</sup> ]                            |                         |                                                                                                      |                            |                        |
| Agriculture                                                     | NaN                     | 328.33                                                                                               | 328.35                     | 328.34                 |
| Commerce, finance and business                                  | NaN                     | 28.90                                                                                                | 31.32                      | 31.29                  |
| Community services                                              | 0.36                    | 9662.34                                                                                              | 9665.45                    | 9657.55                |
| Construction                                                    | NaN                     | 0.01                                                                                                 | 0.01                       | 0.01                   |
| Energy production                                               | 28.21                   | NaN                                                                                                  | NaN                        | 16.72                  |
| Fishing                                                         | 19.05                   | NaN                                                                                                  | NaN                        | 10.42                  |
| Forestry                                                        | NaN                     | 10207.61                                                                                             | 10207.88                   | 10207.73               |
| Industry and manufacturing                                      | NaN                     | 175.00                                                                                               | 177.53                     | 177.52                 |
| Mining and quarrying                                            | 10.35                   | 224.77                                                                                               | 224.81                     | 227.18                 |
| Recreational, leisure and sport                                 | 1.19                    | 620546.48                                                                                            | 620547.67                  | 619495.11              |
| Residential                                                     | NaN                     | 271.87                                                                                               | 283.13                     | 283.04                 |
| Transport, communication networks, storage and protective works | NaN                     | 149.27                                                                                               | 149.98                     | 141.91                 |
| Unused                                                          | NaN                     | 0.00                                                                                                 | 0.00                       | 0.00                   |
| Water and waste treatment                                       | NaN                     | 2.08                                                                                                 | 2.11                       | 2.11                   |
| Unknown                                                         | 2.78                    | 34.15                                                                                                | 12.58                      | 14.00                  |
| Linear Infrastructure clipped to SACHI extent                   | 86.42                   | 81.07                                                                                                | and after fusion:          | 826.21                 |

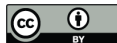

**Table A5.** Part 1: Sample of final contaminated sites dataset. Columns hazard ID, borough, and status (IC stands for "Institutional Controls") were given in the original file, whereas the first and last date, cleanup days, contaminated medium and contaminants information were derived using simple text mining tasks (refer to 2.2.3).

| Hazard ID | Borough          | Status                | First Date | Last Date  | Cleanup Days | Medium            | Contaminants                                                                                                                                                                                                                                                  |
|-----------|------------------|-----------------------|------------|------------|--------------|-------------------|---------------------------------------------------------------------------------------------------------------------------------------------------------------------------------------------------------------------------------------------------------------|
| 26994     | Anchorage        | Cleanup Complete      | 2019-02-13 | 2019-06-28 | 135.0        | soil, groundwater | Petroleum, Benzene, Toluene, Ethylbenzene, and Xylene, Benzene, Toluene, Ethylbenzene, Diesel Range Organics, Diesel, Fuel, Ethylene Dibromide, Gasoline Range Organics, Gasoline, Leaking Underground Storage Tanks, Volatile Organic Compound               |
| 3100      | Northwest Arctic | Active                | 1998-06-09 | NaN        | NaN          | NaN               | Aboveground Storage Tanks, Petroleum, Benzene, Toluene, Ethylbenzene and Xylene, Diesel Range Organics, Diesel, Gasoline Range Organics, Gasoline, Oil, Residual Range Organics                                                                               |
| 23929     | Anchorage        | Cleanup Complete      | 1995-06-05 | 2004-06-22 | 3305.0       | NaN               | Petroleum, Benzene, Toluene, Ethylbenzene and Xylene, Benzene, Toluene, Ethylbenzene, Xylene, Diesel Range Organics, Diesel, Fuel, Gasoline Range Organics, Gasoline, Leaking Underground Storage Tanks, Residual Range Organics, Total Petroleum Hydrocarbon |
| 3606      | Aleutian Islands | Cleanup Complete (IC) | 2000-04-15 | 2006-04-05 | 2181.0       | soil              | Unexploded Ordnance                                                                                                                                                                                                                                           |



**Table A6. Part II:** Sample of final contaminated sites dataset. Columns hazard ID, borough, and status (IC stands for "Institutional Controls") were given in the original file, whereas the first and last date, cleanup days, contaminated medium and contaminants information were derived using simple text mining tasks (refer to 2.2.3).

| Hazard ID | Borough        | Status           | First Date | Last Date  | Cleanup Days | Medium | Contaminants                                                                                                                              |
|-----------|----------------|------------------|------------|------------|--------------|--------|-------------------------------------------------------------------------------------------------------------------------------------------|
| 3774      | Kodiak Island  | Cleanup Complete | 2001-06-21 | 2005-12-30 | 1653.0       | NaN    | Aboveground Storage Tanks, Diesel Range Organics, Diesel, Fuel, Gasoline Range Organics, Gasoline, Leaking Underground Storage Tanks, Oil |
| 23690     | Anchorage      | Cleanup Complete | 1994-11-10 | 2006-04-17 | 4176.0       | NaN    | Petroleum, Benzene, Toluene, Ethylbenzene and Xylene, Benzene, Toluene, Gasoline Range Organics, Leaking Underground Storage Tanks        |
| 24611     | Aleutians East | Cleanup Complete | 1998-09-02 | 2002-04-24 | 1330.0       | NaN    | Petroleum, Leaking Underground Storage Tanks                                                                                              |
| 2361      | North Slope    | Cleanup Complete | 1995-09-08 | 1995-09-08 | 0.0          | NaN    | Diesel Range Organics, Diesel, Fuel                                                                                                       |
| 24927     | Juneau         | Cleanup Complete | 1995-10-27 | 1998-10-22 | 1091.0       | NaN    | Petroleum, Benzene, Toluene, Ethylbenzene and Xylene, Benzene, Gasoline Range Organics, Gasoline, Leaking Underground Storage Tanks       |
| 24867     | Anchorage      | Cleanup Complete | 1996-11-20 | 1996-12-01 | 11.0         | NaN    | Petroleum, Diesel, Leaking Underground Storage Tanks, Petroleum, Oil and Lubricants, Oil, Lubricants                                      |



**Table A7.** Abbreviations indicating toxic substances and contaminant related containment structures. Source: ADEC Glossary (State of Alaska Department of Environmental Conservation, 2023b).

| abbreviation | meaning                                                                                   |
|--------------|-------------------------------------------------------------------------------------------|
| AST          | Aboveground Storage Tanks<br>Petroleum                                                    |
| BTEX         | Benzene, Toluene, Ethylbenzene and Xylene<br>Benzene<br>Toluene<br>Ethylbenzene<br>Xylene |
| DNAPL        | Dense Non-Aqueous Phase liquid                                                            |
| DRO          | Diesel Range Organics<br>Diesel<br>Fuel<br>Kerosin<br>Dioxin                              |
| EDB          | Ethylene Dibromide                                                                        |
| GRO          | Gasoline Range Organics<br>Gasoline                                                       |
| HAZMAT       | Hazardous Materials                                                                       |
| LNAPL        | Light Non-Aqueous Phase Liquid                                                            |
| LUST         | Leaking Underground Storage Tanks                                                         |
| NAPL         | Non-aqueous phase liquid                                                                  |
| PAHs         | Polycyclic Aromatic Hydrocarbons                                                          |
| PCB          | Polychlorinated Biphenyls                                                                 |
| PCE          | Perchloroethylene                                                                         |
| PCE          | Tetrachloroethylene                                                                       |
| PERC         | Tetrachloroethylene                                                                       |
| POL          | Petroleum, Oil and Lubricants                                                             |
| RRO          | Residual Range Organics                                                                   |
| TCE          | Trichloroethylene                                                                         |
| TPH          | Total Petroleum Hydrocarbon                                                               |
| UXO          | Unexploded Ordnance                                                                       |
| VOC          | Volatile Organic Compound                                                                 |



## Appendix B: Application Code Snippets

```
550 import geopandas as gpd

    ## load GPKG file
    geopackage_path = "/path/to/geopackage/PermaRisk_RRNetworkPolygonal_v01_r00.gpkg"

555 ## load layers
    polygon_layer = gpd.read_file(geopackage_path,
                                  layer = 'SACHI_OSM_InfrastructureHIElements')
    line_area_layer = gpd.read_file(geopackage_path,
                                     layer = 'SACHI_OSM_InfrastructureHIElements_RRNetwork')
560 points_layer = gpd.read_file(geopackage_path,
                                 layer = 'DEC_ContaminatedSitesAK')

    ## join IS-HI polygon and line layer
    polygon_layer = polygon_layer.append(line_area_layer)

565 ## create query
    subset = gpd.sjoin(polygon_layer, points_layer, how='inner', predicate='intersects')
    dfcount = subset.groupby('LUCAS')['geometry'].count().rename('pointcount').reset_index()
```

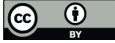

570 *Author contributions.* Conceptualization, S.K., J.B. and G.G. and M.L.; methodology, S.K. and M.L.; software, S.K.; validation, S.K.; formal analysis, S.K., G.G., J.B. and M.L.; resources, M.L.; data curation, S.K. and M.L.; writing—original draft preparation, S.K.; writing—review and editing, S.K., G.G., J.B. and M.L.; visualization, S.K.; supervision, G.G., J.B. and M.L.; project administration, M.L.; funding acquisition, M.L. and S.K.

*Competing interests.* The authors declare that they have no conflict of interest.

575 *Acknowledgements.* This work was conducted within the young investigator group PermaRisk, which is funded by the German Federal Ministry of Education and Research (BMBF) under the funding reference number 01LN1709A. We further acknowledge support by the BMBF funded project UndercoverEisAgenten (ref. nr. 01BF2115A). S.K. also received funding from the Caroline von Humboldt Scholarship Program of Humboldt-Universität Berlin. G.G. acknowledges support by EU Arctic Passion. ChatGPT 3.5 was used to improve the readability of Python scripts and support the identification of errors in the code.





## References

- 580 Alaska Oil and Gas Association: The Role of the Oil and Gas Industry in Alaska's Economy, Tech. rep., <https://www.aoga.org/wp-content/uploads/2021/01/Reports-2020.1.23-Economic-Impact-Report-McDowell-Group-CORRECTED-2020.12.3.pdf>, [Online; accessed 15. Sep. 2023], 2020.
- Alaska Oil and Gas Association: Alaska Oil & Gas Association - State Revenue, <https://www.aoga.org/state-revenue>, [Online; accessed 20. Sep. 2023], 2021.
- 585 Albertini, C., Gioia, A., Iacobellis, V., and Manfreda, S.: Detection of Surface Water and Floods with Multispectral Satellites, *Remote Sensing*, 14, 6005, <https://doi.org/10.3390/rs14236005>, 2022.
- Bartsch, A., Pointner, G., Ingeman-Nielsen, T., and Lu, W.: Towards Circumpolar Mapping of Arctic Settlements and Infrastructure Based on Sentinel-1 and Sentinel-2, *Remote Sensing*, 12, 2368, <https://doi.org/10.3390/rs12152368>, 2020.
- Bartsch, A., Pointner, G., Nitze, I., Efimova, A., Jakober, D., Ley, S., Högström, E., Grosse, G., and Schweitzer, P.: Expanding infrastruc-  
590 ture and growing anthropogenic impacts along Arctic coasts, *Environmental Research Letters*, 16, 115 013, <https://doi.org/10.1088/1748-9326/ac3176>, 2021.
- Beck, H. E., Zimmermann, N. E., McVicar, T. R., Vergopolan, N., Berg, A., and Wood, E. F.: Present and future Köppen-Geiger climate classification maps at 1-km resolution, *Scientific Data*, 5, 1–12, <https://doi.org/10.1038/sdata.2018.214>, 2018.
- Bergstedt, H., Jones, B. M., Walker, D., Peirce, J., Bartsch, A., Pointner, G., Kanevskiy, M., Reynolds, M., and Buchhorn, M.: The spatial  
595 and temporal influence of infrastructure and road dust on seasonal snowmelt, vegetation productivity, and early season surface water cover in the Prudhoe Bay Oilfield, *Arctic Science*, <https://cdnsiencepub.com/doi/full/10.1139/as-2022-0013>, 2022.
- Biskaborn, B. K., Smith, S. L., Noetzli, J., Matthes, H., Vieira, G., Streletskiy, D. A., Schoeneich, P., Romanovsky, V. E., Lewkowicz, A. G., Abramov, A., Allard, M., Boike, J., Cable, W. L., Christiansen, H. H., Delaloye, R., Diekmann, B., Drozdov, D., Etzelmüller, B., Grosse, G., Guglielmin, M., Ingeman-Nielsen, T., Isaksen, K., Ishikawa, M., Johansson, M., Johannsson, H., Joo, A., Kaverin, D., Kholodov, A.,  
600 Konstantinov, P., Kröger, T., Lambiel, C., Lanckman, J.-P., Luo, D., Malkova, G., Meiklejohn, I., Moskalenko, N., Oliva, M., Phillips, M., Ramos, M., Sannel, A. B. K., Sergeev, D., Seybold, C., Skryabin, P., Vasiliev, A., Wu, Q., Yoshikawa, K., Zheleznyak, M., and Lantuit, H.: Permafrost is warming at a global scale, *Nat. Commun.*, 10, 264, 2019.
- Boeing, G.: OSMnx: New methods for acquiring, constructing, analyzing, and visualizing complex street networks, *Computers, Environment and Urban Systems*, 65, 126–139, <https://doi.org/10.1016/j.compenurbsys.2017.05.004>, 2017.
- 605 Brunner, E. M. and Suter, M.: International CIIP Handbook 2008/2009: An Inventory of 25 National and 7 International Critical Information Infrastructure Protection Policies, Center for Security Studies (CSS), ETH, Zürich, Switzerland, <https://doi.org/10.3929/ethz-b-000009792>, 2008.
- Bureau of Economic Analysis: Real value added to the gross domestic product of Alaska in the United States in 2022, by industry (in billion chained 2012 U.S. dollars), in: Statista, Statista, <https://www.statista.com/statistics/1064725/alaska-real-gdp-by-industry/>, [Online; accessed 15. Sep. 2023], 2023a.
- 610 Bureau of Economic Analysis: Regional Economic Accounts: Regional Definitions, <https://apps.bea.gov/regional/definitions>, [Online; accessed 15. Sep. 2023], 2023b.
- Cohen, J., Screen, J. A., Furtado, J. C., Barlow, M., Whittleston, D., Coumou, D., Francis, J., Dethloff, K., Entekhabi, D., Overland, J., and Jones, J.: Recent Arctic amplification and extreme mid-latitude weather, *Nature Geoscience*, 7, 627–637, <https://doi.org/10.1038/ngeo2234>, 2014.
- 615

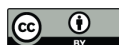

- Department of Labor and Workforce Development: Alaska Population Overview. 2019 Estimates, <https://live.laborstats.alaska.gov/pop/estimates/pub/19popover.pdf>, [Online; accessed 14. Sep. 2023], 2020.
- E4.LUCAS (ESTAT): LUCAS 2018 (Land Use / Cover Area Frame Survey). Technical reference document C3 Classification (Land cover Land use), Tech. rep., Eurostat Regional Statistics and Geographic Information, <https://ec.europa.eu/eurostat/documents/205002/8072634/LUCAS2018-C3-Classification.pdf>, [Online; accessed 18. Sep. 2023], 2018.
- 620 Fortier, D., Allard, M., and Shur, Y.: Observation of rapid drainage system development by thermal erosion of ice wedges on Bylot Island, Canadian Arctic Archipelago, *Permafrost and Periglacial Processes*, 18, 229–243, <https://doi.org/10.1002/ppp.595>, 2007.
- Geopackage Contributors: [geopackage/guidance/getting-started.md](https://github.com/opengeospatial/geopackage/blob/gh-pages/guidance/getting-started.md) at [gh-pages · opengeospatial/geopackage](https://github.com/opengeospatial/geopackage), <https://github.com/opengeospatial/geopackage/blob/gh-pages/guidance/getting-started.md>, 2020.
- 625 Godin, E., Fortier, D., and Burn, C.: Geomorphology of a thermo-erosion gully, Bylot Island, Nunavut, Canada1,21This article is one of a series of papers published in this CJES Special Issue on the theme ofFundamental and applied research on permafrost in Canada.2Polar Continental Shelf Project Contribution 043-11., *Canadian Journal of Earth Sciences*, 49, 979–986, <https://doi.org/10.1139/e2012-015>, 2012.
- Hamilton, L. C., Saito, K., Loring, P. A., Lammers, R. B., and Huntington, H. P.: Climigration? Population and climate change in Arctic Alaska, *Population and Environment*, 38, 115–133, <https://doi.org/10.1007/s11111-016-0259-6>, 2016.
- 630 Hammar, J., Grünberg, I., Kokelj, S. V., van der Sluijs, J., and Boike, J.: Snow accumulation, albedo and melt patterns following road construction on permafrost, Inuvik–Tuktoyaktuk Highway, Canada, *Cryosphere*, 17, 5357–5372, <https://doi.org/10.5194/tc-17-5357-2023>, 2023.
- Hjort, J., Karjalainen, O., Aalto, J., Westermann, S., Romanovsky, V. E., Nelson, F. E., Etzelmüller, B., and Luoto, M.: Degrading permafrost puts Arctic infrastructure at risk by mid-century, *Nature Communications*, 9, 5147, <https://doi.org/10.1038/s41467-018-07557-4>, 2018.
- 635 Irrgang, A. M., Lantuit, H., Gordon, R. R., Piskor, A., and Manson, G. K.: Impacts of past and future coastal changes on the Yukon coast — threats for cultural sites, infrastructure, and travel routes, *Arctic Science*, <https://cdnsiencepub.com/doi/full/10.1139/as-2017-0041>, 2019.
- Irrgang, A. M., Bendixen, M., Farquharson, L. M., Baranskaya, A. V., Erikson, L. H., Gibbs, A. E., Ogorodov, S. A., Overduin, P. P., Lantuit, H., Grigoriev, M. N., and Jones, B. M.: Drivers, dynamics and impacts of changing Arctic coasts, *Nature Reviews Earth & Environment*, 3, 39–54, <https://doi.org/10.1038/s43017-021-00232-1>, 2022.
- 640 Jones, B. M., Grosse, G., Arp, C. D., Jones, M. C., Anthony, K. M. W., and Romanovsky, V. E.: Modern thermokarst lake dynamics in the continuous permafrost zone, northern Seward Peninsula, Alaska, *Journal of Geophysical Research: Biogeosciences*, 116, <https://doi.org/10.1029/2011JG001666>, 2011.
- 645 Jorgensen, T. and Meidlinger, D.: The Alaska Yukon Region of the Circumboreal Vegetation map (CBVM)., <https://oaarchive.arctic-council.org/items/0d744f89-1e18-4249-b6aa-d64bac1bcd3>, [Online; accessed 15. Sep. 2023], 2015.
- Jorgenson, M., Yoshikawa, K., Kanevskiy, M., Shur, Y., Romanovsky, V., Marchenko, S., and Jones, B.: Permafrost Characteristics of Alaska + Map, Ninth International Conference on Permafrost, [https://www.researchgate.net/publication/334524021\\_Permafrost\\_Characteristics\\_of\\_Alaska\\_Map](https://www.researchgate.net/publication/334524021_Permafrost_Characteristics_of_Alaska_Map), 2008.
- 650 Jorgenson, M. T., Shur, Y. L., and Pullman, E. R.: Abrupt increase in permafrost degradation in Arctic Alaska, *Geophysical Research Letters*, 33, <https://doi.org/10.1029/2005GL024960>, 2006.
- Kaiser, S., Boike, J., Grosse, G., and Langer, M.: SIRIUS - Synthesized Inventory of CRITICAL Infrastructure and HUman-Impacted Areas in Permafrost Regions of AlaSka, <https://doi.org/10.5281/zenodo.8311243>, 2023.



- Langer, M., von Deimling, T. S., Westermann, S., Rolph, R., Rutte, R., Antonova, S., Rachold, V., Schultz, M., Oehme, A., and Grosse, G.:  
655 Thawing permafrost poses environmental threat to thousands of sites with legacy industrial contamination, *Nature Communications*, 14,  
1–11, <https://doi.org/10.1038/s41467-023-37276-4>, 2023.
- Leibman, M., Kizyakov, A., Zhdanova, Y., Sonyushkin, A., and Zimin, M.: Coastal Retreat Due to Thermodenudation on the Yugorsky  
Peninsula, Russia during the Last Decade, Update since 2001–2010, *Remote Sensing*, 13, 4042, <https://doi.org/10.3390/rs13204042>,  
2021.
- 660 Liew, M., Xiao, M., Farquharson, L., Nicolsky, D., Jensen, A., Romanovsky, V., Peirce, J., Alessa, L., McComb, C., Zhang, X., and Jones, B.:  
Understanding Effects of Permafrost Degradation and Coastal Erosion on Civil Infrastructure in Arctic Coastal Villages: A Community  
Survey and Knowledge Co-Production, *Journal of Marine Science and Engineering*, 10, 422, <https://doi.org/10.3390/jmse10030422>, 2022.
- Liljedahl, A. K., Boike, J., Daanen, R. P., Fedorov, A. N., Frost, G. V., Grosse, G., Hinzman, L. D., Iijma, Y., Jorgenson, J. C., Matveyeva,  
N., Necsoiu, M., Raynolds, M. K., Romanovsky, V. E., Schulla, J., Tape, K. D., Walker, D. A., Wilson, C. J., Yabuki, H., and Zona,  
665 D.: Pan-Arctic ice-wedge degradation in warming permafrost and its influence on tundra hydrology, *Nature Geoscience*, 9, 312–318,  
<https://doi.org/10.1038/ngeo2674>, 2016.
- Manos, E., Witharana, C., Udawalpola, M. R., Hasan, A., and Liljedahl, A. K.: Convolutional Neural Networks for Automated  
Built Infrastructure Detection in the Arctic Using Sub-Meter Spatial Resolution Satellite Imagery, *Remote Sensing*, 14, 2719,  
<https://doi.org/10.3390/rs14112719>, 2022.
- 670 Markon, C., Gray, S., Berman, M., Eerkes-Medrano, L., Hennessy, T., Huntington, H. P., Littell, J., McCammon, M., Thoman, R., and Trainor,  
S. F.: Chapter 26 : Alaska. Impacts, Risks, and Adaptation in the United States: The Fourth National Climate Assessment, Volume II, Tech.  
rep., <https://doi.org/10.7930/nca4.2018.ch26>, 2018.
- Maxwell, A. E., Warner, T. A., and Guillén, L. A.: Accuracy Assessment in Convolutional Neural Network-Based Deep Learning Remote  
Sensing Studies—Part 1: Literature Review, *Remote Sensing*, 13, 2450, <https://doi.org/10.3390/rs13132450>, 2021.
- 675 Muster, S., Roth, K., Langer, M., Lange, S., Cresto Aleina, F., Bartsch, A., Morgenstern, A., Grosse, G., Jones, B., Sannel, A. B. K., Sjöberg,  
Y., Günther, F., Andresen, C., Veremeeva, A., Lindgren, P. R., Bouchard, F., Lara, M. J., Fortier, D., Charbonneau, S., Virtanen, T. A.,  
Hugelius, G., Palmtag, J., Siewert, M. B., Riley, W. J., Koven, C. D., and Boike, J.: PeRL: a circum-Arctic Permafrost Region Pond and  
Lake database, *Earth System Science Data*, 9, 317–348, <https://doi.org/10.5194/essd-9-317-2017>, 2017.
- National Oceanic and Atmospheric Administration. National Centers for Environmental Information: NOAA NCEI U.S. Cli-  
680 mate Normals Quick Access, [https://www.nci.noaa.gov/access/us-climate-normals/#dataset=normals-monthly&timeframe=30&station=](https://www.nci.noaa.gov/access/us-climate-normals/#dataset=normals-monthly&timeframe=30&station=USW00027406)  
USW00027406, [Online; accessed 20. Aug. 2023], 2023a.
- National Oceanic and Atmospheric Administration. National Centers for Environmental Information: NOAA NCEI U.S. Cli-  
mate Normals Quick Access, [https://www.nci.noaa.gov/access/us-climate-normals/#dataset=normals-monthly&timeframe=30&station=](https://www.nci.noaa.gov/access/us-climate-normals/#dataset=normals-monthly&timeframe=30&station=USW00025507)  
USW00025507, [Online; accessed 20. Aug. 2023], 2023b.
- 685 National Weather Service: U.S. States and Territories, <https://www.weather.gov/gis/USStates>, 2023.
- Nelson, F. E., Anisimov, O. A., and Shiklomanov, N. I.: Subsidence risk from thawing permafrost, *Nature*, 410, 889–890,  
<https://doi.org/10.1038/35073746>, 2001.
- NOAA Office for Coastal Management: Alaska, <https://coast.noaa.gov/states/alaska.html>, [Online; accessed 15. Sep. 2023], 2023.
- Obu, J., Westermann, S., Käab, A., and Bartsch, A.: Ground Temperature Map, 2000–2016, Northern Hemisphere Permafrost, PANGAEA,  
690 <https://doi.org/10.1594/PANGAEA.888600>, 2018.



- Obu, J., Westermann, S., Bartsch, A., Berdnikov, N., Christiansen, H. H., Dashtseren, A., Delaloye, R., Elberling, B., Etzelmüller, B., Kholodov, A., Khomutov, A., Kääh, A., Leibman, M. O., Lewkowicz, A. G., Panda, S. K., Romanovsky, V., Way, R. G., Westergaard-Nielsen, A., Wu, T., Yamkhin, J., and Zou, D.: Northern Hemisphere permafrost map based on TTOP modelling for 2000–2016 at 1 km<sup>2</sup> scale, *Earth-Science Reviews*, 193, 299–316, <https://doi.org/https://doi.org/10.1016/j.earscirev.2019.04.023>, 2019.
- 695 Open Geospatial Consortium: GeoPackage Encoding Standard - Open Geospatial Consortium, <https://www.ogc.org/standard/geopackage/>, 2023.
- OpenStreetMap Contributors and Geofabrik GmbH: Geofabrik Download Server, <http://download.geofabrik.de/>, [Online; accessed 20. Jan. 2023], 2018.
- OpenStreetMap Foundation: Main Page — OpenStreetMap Foundation., [https://osmfoundation.org/w/index.php?title=Main\\_Page&oldid=11226](https://osmfoundation.org/w/index.php?title=Main_Page&oldid=11226), [Online; accessed 20. Sep. 2023], 2023.
- 700 OpenStreetMap Wiki: Map features — OpenStreetMap Wiki, [https://wiki.openstreetmap.org/w/index.php?title=Map\\_features&oldid=2488629](https://wiki.openstreetmap.org/w/index.php?title=Map_features&oldid=2488629), 2023.
- Rajendran, S., Sadooni, F. N., Al-Kuwari, H. A.-S., Oleg, A., Govil, H., Nasir, S., and Vethamony, P.: Monitoring oil spill in Norilsk, Russia using satellite data, *Scientific Reports*, 11, 1–20, <https://doi.org/10.1038/s41598-021-83260-7>, 2021.
- 705 Ramage, J., Jungsberg, L., Wang, S., Westermann, S., Lantuit, H., and Heleniak, T.: Population living on permafrost in the Arctic, *Population and environment*, 43, 22–38, 2021.
- Ramage, J. L., Irrgang, A. M., Herzsich, U., Morgenstern, A., Couture, N., and Lantuit, H.: Terrain controls on the occurrence of coastal retrogressive thaw slumps along the Yukon Coast, Canada, *Journal of Geophysical Research: Earth Surface*, 122, 1619–1634, <https://doi.org/10.1002/2017JF004231>, 2017.
- 710 Rantanen, M., Karpechko, A. Yu., Lipponen, A., Nordling, K., Hyvärinen, O., Ruosteenoja, K., Vihma, T., and Laaksonen, A.: The Arctic has warmed nearly four times faster than the globe since 1979, *Communications Earth & Environment*, 3, 1–10, <https://doi.org/10.1038/s43247-022-00498-3>, 2022.
- Raynolds, M. K., Walker, D. A., Ambrosius, K. J., Brown, J., Everett, K. R., Kanevskiy, M., Kofinas, G. P., Romanovsky, V. E., Shur, Y., and Webber, P. J.: Cumulative geocological effects of 62 years of infrastructure and climate change in ice-rich permafrost landscapes, Prudhoe Bay Oilfield, Alaska, *Global Change Biology*, 20, 1211–1224, <https://doi.org/10.1111/gcb.12500>, 2014.
- 715 Raynolds, M. K., Walker, D. A., Balsler, A., Bay, C., Campbell, M., Cherosov, M. M., Daniëls, F. J. A., Eidesen, P. B., Ermokhina, K. A., Frost, G. V., Jedrzejek, B., Jorgenson, M. T., Kennedy, B. E., Kholod, S. S., Lavrinenko, I. A., Lavrinenko, O. V., Magnússon, B., Matveyeva, N. V., Metúsalemsson, S., Nilsen, L., Olthof, I., Pospelov, I. N., Pospelova, E. B., Pouliot, D., Razzhivin, V., Schaepman-Strub, G., Šibík, J., Telyatnikov, M. Yu., and Troeva, E.: A raster version of the Circumpolar Arctic Vegetation Map (CAVM), *Remote Sensing of Environment*, 232, 111–129, <https://doi.org/10.1016/j.rse.2019.111297>, 2019.
- 720 Rettelbach, T., Nitze, I., Grünberg, I., Hammar, J., Schäffler, S., Hein, D., Gessner, M., Bucher, T., Brauchle, J., Hartmann, J., Sachs, T., Boike, J., and Grosse, G.: Super-high-resolution aerial imagery, digital surface model and 3D point cloud of Shishmaref, Alaska, <https://doi.pangaea.de/10.1594/PANGAEA.962678>, [Online; accessed 20. Dec. 2023], 2023.
- Runge, A., Nitze, I., and Grosse, G.: Remote sensing annual dynamics of rapid permafrost thaw disturbances with LandTrendr, *Remote Sensing of Environment*, 268, 112–125, <https://doi.org/10.1016/j.rse.2021.112752>, 2022.
- 725 Schuur, E. A. G., McGuire, A. D., Schädel, C., Grosse, G., Harden, J. W., Hayes, D. J., Hugelius, G., Koven, C. D., Kuhry, P., Lawrence, D. M., Natali, S. M., Olefeldt, D., Romanovsky, V. E., Schaefer, K., Turetsky, M. R., Treat, C. C., and Vonk, J. E.: Climate change and the permafrost carbon feedback, *Nature*, 520, 171–179, <https://doi.org/10.1038/nature14338>, 2015.



- 730 Schuur, E. A. G., Abbott, B. W., Commane, R., Ernakovich, J., Euskirchen, E., Hugelius, G., Grosse, G., Jones, M., Koven, C., Leshyk, V., Lawrence, D., Lorant, M. M., Mauritz, M., Olefeldt, D., Natali, S., Rodenhizer, H., Salmon, V., Schädel, C., Strauss, J., Treat, C., and Turetsky, M.: Permafrost and Climate Change: Carbon Cycle Feedbacks From the Warming Arctic, *Annual Review of Environment and Resources*, 47, 343–371, <https://doi.org/10.1146/annurev-environ-012220-011847>, 2022.
- Smith, S. L., O’Neill, H. B., Isaksen, K., Noetzli, J., and Romanovsky, V. E.: The changing thermal state of permafrost, *Nature Reviews Earth & Environment*, 3, 10–23, <https://doi.org/10.1038/s43017-021-00240-1>, 2022.
- 735 Speetjens, N. J., Hugelius, G., Gumbrecht, T., Lantuit, H., Berghuijs, W., Pika, P., Poste, A., and Vonk, J.: The Pan-Arctic Catchment Database (ARCADE), *Earth System Science Data Discussions*, 2022, 1–25, <https://doi.org/10.5194/essd-2022-269>, 2022.
- State of Alaska Department of Environmental Conservation: About the Contaminated Sites Program, <https://dec.alaska.gov/spar/csp/about>, 2023a.
- State of Alaska Department of Environmental Conservation: Glossary, <https://dec.alaska.gov/spar/glossary.htm>, 2023b.
- 740 State of Alaska Department of Environmental Conservation: Glossary. Closure of a contaminated site, <https://dec.alaska.gov/spar/glossary.htm#closure>, 2023c.
- The Information Architects of Encyclopaedia Britannica, journal = Encyclopedia Britannica, y . . n . . O . u . . h.: Alaska.
- Van Everdingen, R. O.: Multi-language glossary of permafrost and related ground-ice terms (Rev. ed. 2005), [https://globalcryospherewatch.org/reference/glossary\\_docs/Glossary\\_of\\_Permafrost\\_and\\_Ground-Ice\\_IPA\\_2005.pdf](https://globalcryospherewatch.org/reference/glossary_docs/Glossary_of_Permafrost_and_Ground-Ice_IPA_2005.pdf), 2005.
- 745 van Vuuren, D. P., Edmonds, J., Kainuma, M., Riahi, K., Thomson, A., Hibbard, K., Hurtt, G. C., Kram, T., Krey, V., Lamarque, J.-F., Masui, T., Meinshausen, M., Nakicenovic, N., Smith, S. J., and Rose, S. K.: The representative concentration pathways: an overview, *Climatic Change*, 109, 5–31, <https://doi.org/10.1007/s10584-011-0148-z>, 2011.
- Walker, D. A., Raynolds, M. K., Kanevskiy, M. Z., Shur, Y. S., Romanovsky, V. E., Jones, B. M., Buchhorn, M., Jorgenson, M. T., Šibík, J., Breen, A. L., Kade, A., Watson-Cook, E., Matyshak, G., Bergstedt, H., Liljedahl, A. K., Daanen, R. P., Connor, B., Nicolsky, D., and Peirce, J. L.: Cumulative impacts of a gravel road and climate change in an ice-wedge-polygon landscape, Prudhoe Bay, Alaska, *Arctic Science*, <https://cdnscepub.com/doi/full/10.1139/as-2021-0014>, 2022.
- 750 Wang, S., Ramage, J., Bartsch, A., and Efimova, A.: Population in the Arctic Circumpolar Permafrost Region at settlement level, <https://doi.org/10.5281/zenodo.4529610>, 2021.
- Warmerdam, F., Rouault, E., , and contributors, G.: GPKG – GeoPackage vector, <https://gdal.org/drivers/vector/gpkg.html#gpkg-geopackage-vector>, 2023.
- 755 Xu, X., Liu, C., Liu, C., Hui, F., Cheng, X., and Huang, H.: Fine-resolution mapping of the circumpolar Arctic Man-made impervious areas (CAMI) using sentinels, OpenStreetMap and ArcticDEM, *Big Earth Data*, 6, 196–218, <https://doi.org/10.1080/20964471.2022.2025663>, 2022.
